# Supplementary material for: Exploring the Protective Effects and Mechanism of Crocetin From Saffron Against NAFLD by Network Pharmacology and Experimental Validation
Source: PubMed Central journal article supplement (PMC8219931; doi:10.3389/fmed.2021.681391), 2021-06-09
Supplement: Data_Sheet_1.pdf [file Data_Sheet_1.pdf]

Supplementary Material

**Supplement Table S1.** More detailed information of 206 common targets.

| Uniprot ID | Target gene | Target protein                                             | Uniprot ID | Target gene | Target protein                                       |
|------------|-------------|------------------------------------------------------------|------------|-------------|------------------------------------------------------|
| P19320     | VCAM1       | Vascular cell adhesion protein 1                           | Q01959     | SLC6A3      | Solute carrier family 6 member 3                     |
| P23219     | PTGS1       | Prostaglandin G/H synthase 1                               | P78527     | PRKDC       | DNA-dependent protein kinase catalytic subunit       |
| P10275     | AR          | Androgen receptor                                          | P42345     | MTOR        | Serine/threonine-protein kinase mTOR                 |
| P35354     | PTGS2       | Prostaglandin G/H synthase 2                               | Q96IY4     | CPB2        | Carboxypeptidase B2                                  |
| Q04206     | RELA        | Transcription factor p65                                   | P30556     | AGTR1       | Type-1 angiotensin II receptor                       |
| P00533     | EGFR        | Epidermal growth factor receptor                           | P24863     | CCNC        | Cyclin-C                                             |
| P31749     | AKT1        | RAC-alpha serine/threonine-protein kinase                  | P49336     | CDK8        | Cyclin-dependent kinase 8                            |
| P15692     | VEGFA       | Vascular endothelial growth factor A                       | P05556     | ITGB1       | Integrin beta-1                                      |
| P24385     | CCND1       | G1/S-specific cyclin-D1                                    | P08581     | MET         | Hepatocyte growth factor receptor                    |
| P10415     | BCL2        | Apoptosis regulator Bcl-2                                  | Q96RR4     | CAMKK2      | Calcium/calmodulin-dependent protein kinase kinase 2 |
| P01100     | FOS         | Proto-oncogene c-Fos                                       | Q9UHD2     | TBK1        | TANK-binding kinase 1<br>Ectonucleotide              |
| P38936     | CDKN1A      | Cyclin-dependent kinase inhibitor 1                        | Q13822     | ENPP2       | pyrophosphatase/phosphodiesterase family member 2    |
| Q07812     | BAX         | Apoptosis regulator BAX                                    | P15085     | CPA1        | Carboxypeptidase A1                                  |
| P55211     | CASP9       | Caspase-9                                                  | P25025     | CXCR2       | C-X-C chemokine receptor type 2                      |
| P08253     | MMP2        | Matrix metalloproteinase-2                                 | P47871     | GCGR        | Glucagon receptor                                    |
| P14780     | MMP9        | Matrix metalloproteinase-9                                 | P05023     | ATP1A1      | Sodium/potassium-transporting ATPase subunit alpha-1 |
| P28482     | MAPK1       | Mitogen-activated protein kinase 1                         | P40763     | STAT3       | Signal transducer and activator of transcription 3   |
| P22301     | IL10        | Interleukin-10                                             | Q05655     | PRKCD       | Protein kinase C delta type                          |
| P01133     | EGF         | Pro-epidermal growth factor                                | P11473     | VDR         | Vitamin D3 receptor                                  |
| P05412     | JUN         | Transcription factor AP-1                                  | P18031     | PTPN1       | Tyrosine-protein phosphatase non-receptor type 1     |
| P05231     | IL6         | Interleukin-6                                              | Q15257     | PTPA        | Serine/threonine-protein phosphatase 2A activator    |
| O95433     | AHSA1       | Activator of 90 kDa heat shock protein<br>ATPase homolog 1 | Q15393     | SF3B3       | Splicing factor 3B subunit 3                         |

|        |         |                                                        |        |         |                                                 |
|--------|---------|--------------------------------------------------------|--------|---------|-------------------------------------------------|
| P42574 | CASP3   | Caspase-3                                              | P00734 | F2      | Activation peptide fragment 2                   |
| Q9H3D4 | TP63    | Tumor protein 63                                       | Q02156 | PRKCE   | Protein kinase C epsilon type                   |
| Q14790 | CASP8   | Caspase-8                                              | P28845 | HSD11B1 | Corticosteroid 11-beta-dehydrogenase isozyme 1  |
| P00441 | SOD1    | Superoxide dismutase 1                                 | P05230 | FGF1    | Fibroblast growth factor 1                      |
| P17252 | PRKCA   | Protein kinase C alpha type                            | Q9Y251 | HPSE    | Heparanase                                      |
| P03956 | MMP1    | Matrix metalloproteinase-1                             | P00915 | CA1     | Carbonic anhydrase 1                            |
| Q16665 | HIF1A   | Hypoxia-inducible factor 1-alpha                       | P14416 | DRD2    | Dopamine D2 receptor                            |
| P42224 | STAT1   | Signal transducer and activator of transcription 1     | P28223 | HTR2A   | 5-hydroxytryptamine receptor 2A                 |
| P37231 | PPARG   | Peroxisome proliferator-activated receptor gamma       | P10635 | CYP2D6  | Cytochrome P450 2D6                             |
| Q13085 | ACACA   | Acetyl-CoA carboxylase 1                               | P28222 | HTR1B   | 5-hydroxytryptamine receptor 1B                 |
| P09601 | HMOX1   | Heme oxygenase 1                                       | P35372 | OPRM1   | Mu-type opioid receptor                         |
| P08684 | CYP3A4  | Cytochrome P450 3A4                                    | P37268 | FDFT1   | Squalene synthase                               |
| P05177 | CYP1A2  | Cytochrome P450 1A2                                    | Q14534 | SQLE    | Squalene monooxygenase                          |
| Q03135 | CAV1    | Caveolin-1                                             | P17931 | LGALS3  | Galectin-3                                      |
| P01106 | MYC     | Myc proto-oncogene protein                             | P11166 | SLC2A1  | Solute carrier family 2                         |
| P13726 | F3      | Tissue factor                                          | O95342 | ABCB11  | ATP-binding cassette sub-family B member 11     |
| P04798 | CYP1A1  | Cytochrome P450 1A1                                    | P34972 | CNR2    | Cannabinoid receptor 2                          |
| P05362 | ICAM1   | Intercellular adhesion molecule 1                      | P55085 | F2RL1   | Proteinase-activated receptor 2                 |
| P01584 | IL1B    | Interleukin-1 beta                                     | P11717 | IGF2R   | Cation-independent mannose-6-phosphate receptor |
| P13500 | CCL2    | C-C motif chemokine 2                                  | P23975 | SLC6A2  | Sodium-dependent noradrenaline transporter      |
| P10145 | CXCL8   | Interleukin-8                                          | Q9NR96 | TLR9    | Toll-like receptor 9                            |
| P05771 | PRKCB   | Protein kinase C beta type                             | P20309 | CHRM3   | Muscarinic acetylcholine receptor M3            |
| Q9NRD8 | DUOX2   | Dual oxidase 2                                         | P31639 | SLC5A2  | Sodium/glucose cotransporter 2                  |
| P29474 | NOS3    | Nitric oxide synthase, endothelial                     | Q9NPH5 | NOX4    | NADPH oxidase 4                                 |
| P04792 | HSPB1   | Heat shock protein beta-1                              | P47989 | XDH     | Xanthine dehydrogenase/oxidase                  |
| P49888 | SULT1E1 | Sulfotransferase 1E1                                   | P21397 | MAOA    | Monoamine oxidase type A                        |
| P60568 | IL2     | Interleukin-2                                          | P08069 | IGF1R   | Insulin-like growth factor 1 receptor           |
| O75469 | NR1I2   | Nuclear receptor subfamily 1 group I member 2          | P11511 | CYP19A1 | Cytochrome P450 19A1                            |
| P00797 | REN     | Renin                                                  | P14174 | MIF     | Macrophage migration inhibitory factor          |
| Q13526 | PIN1    | Peptidyl-prolyl cis-trans isomerase NIMA-interacting 1 | Q99523 | SORT1   | Sortilin                                        |

|        |          |                                                          |        |         |                                                                                |
|--------|----------|----------------------------------------------------------|--------|---------|--------------------------------------------------------------------------------|
| P05121 | SERPINE1 | Plasminogen activator inhibitor 1                        | P21917 | DRD4    | D(4) dopamine receptor                                                         |
| P02452 | COL1A1   | Collagen alpha-1(I) chain                                | P27986 | PIK3R1  | Phosphatidylinositol 3-kinase regulatory subunit alpha                         |
| P01579 | IFNG     | Interferon gamma                                         | P45452 | MMP13   | Matrix metalloproteinase-13                                                    |
| P09917 | ALOX5    | Polyunsaturated fatty acid 5-lipoxygenase                | P16050 | ALOX15  | Polyunsaturated fatty acid lipoxygenase ALOX15                                 |
| P01583 | IL1A     | Interleukin-1 alpha                                      | P18054 | ALOX12  | Polyunsaturated fatty acid lipoxygenase ALOX12                                 |
| P05164 | MPO      | Myeloperoxidase                                          | Q9UM73 | ALK     | Anaplastic lymphoma kinase                                                     |
| P14598 | NCF1     | Neutrophil cytosol factor 1                              | P10636 | MAPT    | Microtubule-associated protein tau                                             |
| P09211 | GSTP1    | Glutathione S-transferase P                              | P22303 | ACHE    | Acetylcholinesterase                                                           |
| Q16236 | NFE2L2   | Nuclear factor erythroid 2-related factor 2              | P48736 | PIK3CG  | Phosphatidylinositol 4,5-bisphosphate 3-kinase catalytic subunit gamma isoform |
| P15559 | NQO1     | NAD(P)H dehydrogenase                                    | P11474 | ESRRA   | Steroid hormone receptor ERR1                                                  |
| P09874 | PARP1    | Poly [ADP-ribose] polymerase 1                           | P05067 | APP     | Amyloid-beta precursor protein                                                 |
| P35869 | AHR      | Aryl hydrocarbon receptor                                | P02766 | TTR     | Transthyretin                                                                  |
| Q9NR83 | SLC2A4   | SLC2A4 regulator                                         | O60218 | AKR1B10 | Aldo-keto reductase family 1 member B10                                        |
| P02461 | COL3A1   | Collagen alpha-1(III) chain                              | O14746 | TERT    | Telomerase reverse transcriptase                                               |
| Q14994 | NR1I3    | Nuclear receptor subfamily 1 group I member 3            | Q20BH0 | CFTR    | Cystic fibrosis transmembrane conductance regulator                            |
| P06213 | INSR     | Insulin receptor                                         | P06276 | BCHE    | Butyrylcholine esterase                                                        |
| Q07869 | PPARA    | Peroxisome proliferator-activated receptor alpha         | P00747 | PLG     | Plasminogen                                                                    |
| Q03181 | PPARD    | Peroxisome proliferator-activated receptor delta         | P23141 | CES1    | Liver carboxylesterase 1                                                       |
| P02741 | CRP      | C-reactive protein                                       | P34949 | MPI     | Mannose-6-phosphate isomerase                                                  |
| P02778 | CXCL10   | C-X-C motif chemokine 10                                 | O00748 | CES2    | Cocaine esterase                                                               |
| O15111 | CHUK     | Inhibitor of nuclear factor kappa-B kinase subunit alpha | P07327 | ADH1A   | Alcohol dehydrogenase 1A                                                       |
| P10451 | SPP1     | Secreted phosphoprotein 1                                | P00326 | ADH1C   | Alcohol dehydrogenase 1C                                                       |
| Q13950 | RUNX2    | Q13950                                                   | P00325 | ADH1B   | Alcohol dehydrogenase 1B                                                       |
| Q01094 | E2F1     | Transcription factor E2F1                                | P34969 | HTR7    | 5-hydroxytryptamine receptor 7, 5-HT-7                                         |
| P07339 | CTSD     | Cathepsin D                                              | P10276 | RARA    | Retinoic acid receptor alpha                                                   |
| P17936 | IGFBP3   | Insulin-like growth factor-binding protein 3             | Q99685 | MGLL    | Monoglyceride lipase                                                           |
| P11717 | IGF2     | Cation-independent mannose-6-phosphate receptor          | P08319 | ADH4    | Alcohol dehydrogenase 4                                                        |

|        |          |                                                         |        |        |                                                                  |
|--------|----------|---------------------------------------------------------|--------|--------|------------------------------------------------------------------|
| P29965 | CD40LG   | CD40 ligand                                             | P04150 | NR3C1  | Nuclear receptor subfamily 3 group C member 1                    |
| P27169 | PON1     | Serum paraoxonase/arylesterase 1                        | P07858 | CTSB   | Cathepsin B                                                      |
| P09488 | GSTM1    | Glutathione S-transferase Mu 1                          | P48443 | RXRG   | Retinoic acid receptor RXR-gamma                                 |
| P28161 | GSTM2    | Glutathione S-transferase Mu 2                          | P19793 | RXRA   | Retinoic acid receptor RXR-alpha                                 |
| P03973 | SLPI     | Antileukoproteinase                                     | Q8IXJ6 | SIRT2  | NAD-dependent protein deacetylase sirtuin-2                      |
| O14920 | IKBKB    | Inhibitor of nuclear factor kappa-B kinase subunit beta | Q99572 | P2RX7  | P2X purinoceptor 7                                               |
| P45983 | MAPK8    | Mitogen-activated protein kinase 8                      | P07202 | TPO    | Thyroid peroxidase                                               |
| P35228 | NOS2     | Nitric oxide synthase                                   | P21757 | MSR1   | Macrophage scavenger receptor types I and II                     |
| P78380 | OLR1     | Oxidized low-density lipoprotein receptor 1             | P11940 | PABPC1 | Polyadenylate-binding protein 1                                  |
| P49841 | GSK3B    | Glycogen synthase kinase-3 beta                         | P11509 | CYP2A6 | Cytochrome P450 2A6                                              |
| P12821 | ACE      | Angiotensin-converting enzyme                           | Q9BY41 | HDAC8  | Histone deacetylase 8                                            |
| P15121 | AKR1B1   | Aldo-keto reductase family 1 member B1                  | P01375 | TNF    | Tumor necrosis factor                                            |
| P14550 | AKR1A1   | Aldo-keto reductase family 1 member A1                  | P25774 | CTSS   | Cathepsin S                                                      |
| P31645 | SLC6A4   | Solute carrier family 6 member 4                        | P08235 | NR3C2  | Mineralocorticoid receptor                                       |
| P07900 | HSP90AA1 | Heat shock protein HSP 90-alpha                         | P04278 | SHBG   | Sex hormone-binding globulin                                     |
| P42336 | PIK3CA   | Phosphoinositide-3-kinase catalytic alpha polypeptide   | P07148 | FABP1  | Fatty acid-binding protein                                       |
| O75907 | DGAT1    | Diacylglycerol O-acyltransferase 1                      | Q8NER1 | TRPV1  | Transient receptor potential cation channel subfamily V member 1 |
| P27338 | MAOB     | Monoamine oxidase type B                                | P11142 | HSPA8  | Heat shock cognate 71 kDa protein                                |
| P15090 | FABP4    | Fatty acid-binding protein 4                            | P11021 | HSPA5  | Heat shock protein 70 family protein 5                           |
| P22736 | NR4A1    | Nuclear receptor subfamily 4 group A member 1           | P16278 | GLB1   | Beta-galactosidase                                               |
| P03372 | ESR1     | Estrogen receptor                                       | P23526 | AHCY   | Adenosylhomocysteinase                                           |
| Q16875 | PFKFB3   | 6-phosphofructo-2-kinase/fructose-2,6-bisphosphatase 3  | P78536 | ADAM17 | Disintegrin and metalloproteinase domain-containing protein 17   |
| P0DMV8 | HSPA1A   | Heat shock 70 kDa protein 1A                            | P17948 | FLT1   | Vascular endothelial growth factor receptor 1                    |
| P50416 | CPT1A    | Carnitine O-palmitoyltransferase 1                      | O75460 | ERN1   | Endoplasmic reticulum-to-nucleus signaling 1                     |

**Supplement Table S2.** The specific targets in signaling pathways.

| <b>Signaling pathway</b>                             | <b>Specific targets</b>                                                                                                                                                                                                 |
|------------------------------------------------------|-------------------------------------------------------------------------------------------------------------------------------------------------------------------------------------------------------------------------|
| NON-ALCOHOLIC FATTY LIVER DISEASE                    | IL-6, TNF- $\alpha$ , NF- $\kappa$ B, INSR, RXR, PI3K, AKT, GSK-3, PPAR- $\alpha$ , JNK1/2, IRE1- $\alpha$ , CASP8, Bax, JNK1, IKK- $\beta$ , AP-1, c-Jun, IL-1, IL-8, CASP3.                                           |
| AGE-RAGE SIGNALING PATHWAY IN DIABETIC COMPLICATIONS | AT1R, ANDPH, PKC, PI3K, ERK1/2, JNK, AKT, NOS, STAT3, STAT1, PKC $\beta$ II, AP-1, NF- $\kappa$ B, Bcl-2, Bax, COL, VEGF, MCP-1, PAI-1, VCAM-1, ICAM-1, MMP2, IL-1, IL-8, IL-6, TNF- $\alpha$ , TF, CASP3, COL1, CycD1. |
| TNF SIGNALING PATHWAY                                | TNF, NF- $\kappa$ B, IKK $\beta$ , IKK $\alpha$ , CASP8, CASP3, JNK1/2, ERK1/2, AP-1, PI3K, AKT, IKKs, JNK, c-Jun, Ccl2, CXCL10, IL1B, IL-6, Fos, Jun, MMP9, ICAM1, VCAM1, PTGS2.                                       |
| HIF-1 SIGNALING PATHWAY                              | IL-6, PI3K, AKT, mTOR, PKC, HIF-1 $\alpha$ , ERK, PKC, STAT3, NF- $\kappa$ B, VEGF, FLT1, EGF, PAI-1, iNOS, eNOS, HMOX1, Glut1, Bcl-2.                                                                                  |

**Supplement Table S3.** Details of the PPI network.

| #node1 | node2  | node1_string_id      | node2_string_id      | neighborhood_chromosome | gene_fusion | phylogenetic_cooccurrence | homology | coexpression | experimentally_determined_interaction | database_annotated | automated_extending | combined_score |
|--------|--------|----------------------|----------------------|-------------------------|-------------|---------------------------|----------|--------------|---------------------------------------|--------------------|---------------------|----------------|
| ACE    | REN    | 9606.ENSP00000290866 | 9606.ENSP00000272190 | 0                       | 0           | 0                         | 0        | 0            | 0                                     | 0                  | 0.959               | 0.959          |
| ACE    | AGTR1  | 9606.ENSP00000290866 | 9606.ENSP00000419422 | 0                       | 0           | 0                         | 0        | 0.06         | 0                                     | 0                  | 0.927               | 0.928          |
| ADAM17 | SORT1  | 9606.ENSP00000309968 | 9606.ENSP00000256637 | 0                       | 0           | 0                         | 0        | 0            | 0                                     | 0.9                | 0.209               | 0.917          |
| ADAM17 | EGF    | 9606.ENSP00000309968 | 9606.ENSP00000265171 | 0                       | 0           | 0                         | 0        | 0            | 0                                     | 0.9                | 0.806               | 0.979          |
| ADAM17 | PRKCB  | 9606.ENSP00000309968 | 9606.ENSP00000305355 | 0                       | 0           | 0                         | 0        | 0            | 0                                     | 0.9                | 0                   | 0.900          |
| ADAM17 | PRKCA  | 9606.ENSP00000309968 | 9606.ENSP00000408695 | 0                       | 0           | 0                         | 0        | 0            | 0                                     | 0.9                | 0.083               | 0.904          |
| ADAM17 | TNF    | 9606.ENSP00000309968 | 9606.ENSP00000398698 | 0                       | 0           | 0                         | 0        | 0.061        | 0.379                                 | 0.9                | 0.692               | 0.979          |
| ADH1A  | ADH1C  | 9606.ENSP00000209668 | 9606.ENSP00000426083 | 0                       | 0           | 0.449                     | 0.985    | 0.182        | 0                                     | 0.9                | 0.86                | 0.916          |
| ADH1A  | ADH1B  | 9606.ENSP00000209668 | 9606.ENSP00000306606 | 0                       | 0           | 0.449                     | 0.985    | 0.828        | 0                                     | 0.9                | 0.892               | 0.982          |
| ADH1B  | MAOA   | 9606.ENSP00000306606 | 9606.ENSP00000340684 | 0                       | 0           | 0                         | 0        | 0.103        | 0                                     | 0.9                | 0.368               | 0.938          |
| ADH1B  | ADH1C  | 9606.ENSP00000306606 | 9606.ENSP00000426083 | 0                       | 0           | 0.449                     | 0.986    | 0.179        | 0.692                                 | 0.9                | 0.921               | 0.973          |
| ADH4   | MAOA   | 9606.ENSP00000265512 | 9606.ENSP00000340684 | 0                       | 0           | 0                         | 0        | 0.061        | 0                                     | 0.9                | 0.203               | 0.918          |
| AGTR1  | CFTR   | 9606.ENSP00000419422 | 9606.ENSP00000003084 | 0                       | 0           | 0                         | 0        | 0            | 0                                     | 0.9                | 0.089               | 0.905          |
| AGTR1  | CHRM3  | 9606.ENSP00000419422 | 9606.ENSP00000255380 | 0                       | 0           | 0                         | 0.609    | 0            | 0                                     | 0.9                | 0.349               | 0.912          |
| AGTR1  | PIK3CA | 9606.ENSP00000419422 | 9606.ENSP00000263967 | 0                       | 0           | 0                         | 0        | 0            | 0.05                                  | 0.9                | 0.053               | 0.902          |
| AGTR1  | EGF    | 9606.ENSP00000419422 | 9606.ENSP00000265171 | 0                       | 0           | 0                         | 0        | 0            | 0.062                                 | 0.9                | 0.4                 | 0.938          |
| AGTR1  | REN    | 9606.ENSP00000419422 | 9606.ENSP00000272190 | 0                       | 0           | 0                         | 0        | 0.055        | 0                                     | 0                  | 0.954               | 0.955          |
| AGTR1  | EGFR   | 9606.ENSP00000419422 | 9606.ENSP00000275493 | 0                       | 0           | 0                         | 0        | 0.076        | 0.406                                 | 0.9                | 0.424               | 0.964          |
| AGTR1  | APP    | 9606.ENSP00000419422 | 9606.ENSP00000284981 | 0                       | 0           | 0                         | 0        | 0            | 0                                     | 0.9                | 0.221               | 0.918          |
| AGTR1  | F2RL1  | 9606.ENSP00000419422 | 9606.ENSP00000296677 | 0                       | 0           | 0                         | 0.693    | 0            | 0                                     | 0.9                | 0.195               | 0.904          |

|         |          |                      |                      |       |   |       |       |       |       |     |       |       |
|---------|----------|----------------------|----------------------|-------|---|-------|-------|-------|-------|-----|-------|-------|
| AGTR1   | CXCL8    | 9606.ENSP00000419422 | 9606.ENSP00000306512 | 0     | 0 | 0     | 0     | 0     | 0     | 0.9 | 0.293 | 0.926 |
| AGTR1   | F2       | 9606.ENSP00000419422 | 9606.ENSP00000308541 | 0     | 0 | 0     | 0     | 0.063 | 0     | 0.9 | 0.325 | 0.931 |
| AGTR1   | IGF2R    | 9606.ENSP00000419422 | 9606.ENSP00000349437 | 0     | 0 | 0     | 0     | 0     | 0     | 0.9 | 0.257 | 0.922 |
| AGTR1   | GCGR     | 9606.ENSP00000419422 | 9606.ENSP00000383558 | 0     | 0 | 0     | 0     | 0.064 | 0     | 0.9 | 0.189 | 0.917 |
| AGTR1   | OPRM1    | 9606.ENSP00000419422 | 9606.ENSP00000394624 | 0     | 0 | 0     | 0.753 | 0     | 0     | 0.9 | 0.268 | 0.905 |
| AGTR1   | HTR2A    | 9606.ENSP00000419422 | 9606.ENSP00000437737 | 0     | 0 | 0     | 0.587 | 0     | 0     | 0.9 | 0.187 | 0.906 |
| AGTR1   | PIK3R1   | 9606.ENSP00000419422 | 9606.ENSP00000428056 | 0     | 0 | 0     | 0     | 0     | 0.057 | 0.9 | 0.099 | 0.907 |
| AGTR1   | HSPA8    | 9606.ENSP00000419422 | 9606.ENSP00000432083 | 0     | 0 | 0     | 0     | 0     | 0.053 | 0.9 | 0.185 | 0.916 |
| AHR     | HSP90AA1 | 9606.ENSP00000242057 | 9606.ENSP00000335153 | 0     | 0 | 0     | 0     | 0     | 0.472 | 0.9 | 0.818 | 0.989 |
| AHR     | CYP1A1   | 9606.ENSP00000242057 | 9606.ENSP00000369050 | 0     | 0 | 0     | 0     | 0.061 | 0     | 0.9 | 0.975 | 0.997 |
| AHSA1   | HSP90AA1 | 9606.ENSP00000216479 | 9606.ENSP00000335153 | 0     | 0 | 0     | 0     | 0.689 | 0.827 | 0   | 0.934 | 0.996 |
| AKR1A1  | MGLL     | 9606.ENSP00000361140 | 9606.ENSP00000265052 | 0.045 | 0 | 0     | 0     | 0.063 | 0     | 0.9 | 0     | 0.902 |
| AKR1A1  | MAOB     | 9606.ENSP00000361140 | 9606.ENSP00000367309 | 0     | 0 | 0     | 0     | 0.062 | 0     | 0.9 | 0.223 | 0.92  |
| AKR1B1  | MGLL     | 9606.ENSP00000285930 | 9606.ENSP00000265052 | 0.045 | 0 | 0     | 0     | 0.063 | 0     | 0.9 | 0     | 0.902 |
| AKR1B1  | GLB1     | 9606.ENSP00000285930 | 9606.ENSP00000306920 | 0.058 | 0 | 0     | 0     | 0.055 | 0     | 0.9 | 0.085 | 0.907 |
| AKR1B1  | AKR1B10  | 9606.ENSP00000285930 | 9606.ENSP00000352584 | 0     | 0 | 0.449 | 0.975 | 0.099 | 0     | 0.9 | 0.743 | 0.908 |
| AKR1B10 | MGLL     | 9606.ENSP00000352584 | 9606.ENSP00000265052 | 0.045 | 0 | 0     | 0     | 0.063 | 0     | 0.9 | 0.058 | 0.904 |
| AKR1B10 | GLB1     | 9606.ENSP00000352584 | 9606.ENSP00000306920 | 0.058 | 0 | 0     | 0     | 0.055 | 0     | 0.9 | 0.063 | 0.905 |
| AKT1    | MAPK1    | 9606.ENSP00000451828 | 9606.ENSP00000215832 | 0     | 0 | 0.304 | 0.592 | 0.066 | 0.146 | 0.8 | 0.948 | 0.905 |
| AKT1    | IL2      | 9606.ENSP00000451828 | 9606.ENSP00000226730 | 0     | 0 | 0     | 0     | 0     | 0     | 0.9 | 0.793 | 0.978 |
| AKT1    | CCND1    | 9606.ENSP00000451828 | 9606.ENSP00000227507 | 0     | 0 | 0     | 0     | 0.061 | 0     | 0   | 0.941 | 0.943 |
| AKT1    | HSPB1    | 9606.ENSP00000451828 | 9606.ENSP00000248553 | 0     | 0 | 0     | 0     | 0     | 0.698 | 0   | 0.864 | 0.957 |
| AKT1    | RARA     | 9606.ENSP00000451828 | 9606.ENSP00000254066 | 0     | 0 | 0     | 0     | 0.088 | 0.407 | 0.9 | 0.325 | 0.958 |
| AKT1    | PIK3CA   | 9606.ENSP00000451828 | 9606.ENSP00000263967 | 0     | 0 | 0     | 0     | 0.063 | 0.468 | 0.9 | 0.978 | 0.998 |
| AKT1    | STAT3    | 9606.ENSP00000451828 | 9606.ENSP00000264657 | 0     | 0 | 0     | 0     | 0     | 0.124 | 0.9 | 0.938 | 0.994 |
| AKT1    | EGF      | 9606.ENSP00000451828 | 9606.ENSP00000265171 | 0     | 0 | 0     | 0     | 0     | 0.05  | 0   | 0.932 | 0.933 |

|      |          |                      |                      |   |   |       |       |       |       |     |       |       |
|------|----------|----------------------|----------------------|---|---|-------|-------|-------|-------|-----|-------|-------|
| AKT1 | SOD1     | 9606.ENSP00000451828 | 9606.ENSP00000270142 | 0 | 0 | 0     | 0     | 0     | 0.064 | 0.9 | 0.64  | 0.963 |
| AKT1 | NOS3     | 9606.ENSP00000451828 | 9606.ENSP00000297494 | 0 | 0 | 0     | 0     | 0.049 | 0.693 | 0.9 | 0.97  | 0.999 |
| AKT1 | INSR     | 9606.ENSP00000451828 | 9606.ENSP00000303830 | 0 | 0 | 0     | 0.559 | 0.052 | 0.288 | 0.9 | 0.677 | 0.948 |
| AKT1 | TERT     | 9606.ENSP00000451828 | 9606.ENSP00000309572 | 0 | 0 | 0     | 0     | 0.055 | 0.379 | 0.9 | 0.783 | 0.985 |
| AKT1 | CASP3    | 9606.ENSP00000451828 | 9606.ENSP00000311032 | 0 | 0 | 0     | 0     | 0.055 | 0.393 | 0   | 0.95  | 0.969 |
| AKT1 | PRKDC    | 9606.ENSP00000451828 | 9606.ENSP00000313420 | 0 | 0 | 0     | 0     | 0.058 | 0.432 | 0.9 | 0.805 | 0.988 |
| AKT1 | SLC2A4   | 9606.ENSP00000451828 | 9606.ENSP00000320935 | 0 | 0 | 0     | 0     | 0     | 0.261 | 0   | 0.902 | 0.925 |
| AKT1 | GSK3B    | 9606.ENSP00000451828 | 9606.ENSP00000324806 | 0 | 0 | 0.218 | 0.576 | 0.049 | 0.995 | 0.9 | 0.918 | 0.999 |
| AKT1 | NOS2     | 9606.ENSP00000451828 | 9606.ENSP00000327251 | 0 | 0 | 0     | 0     | 0.063 | 0.065 | 0.8 | 0.543 | 0.909 |
| AKT1 | CASP9    | 9606.ENSP00000451828 | 9606.ENSP00000330237 | 0 | 0 | 0     | 0     | 0     | 0.393 | 0.9 | 0.919 | 0.994 |
| AKT1 | HSP90AA1 | 9606.ENSP00000451828 | 9606.ENSP00000335153 | 0 | 0 | 0     | 0     | 0.061 | 0.806 | 0.9 | 0.92  | 0.998 |
| AKT1 | CAV1     | 9606.ENSP00000451828 | 9606.ENSP00000339191 | 0 | 0 | 0     | 0     | 0     | 0.057 | 0.9 | 0.815 | 0.981 |
| AKT1 | E2F1     | 9606.ENSP00000451828 | 9606.ENSP00000345571 | 0 | 0 | 0     | 0     | 0.091 | 0.124 | 0.9 | 0.481 | 0.953 |
| AKT1 | PIK3CG   | 9606.ENSP00000451828 | 9606.ENSP00000352121 | 0 | 0 | 0     | 0     | 0.063 | 0.174 | 0.9 | 0.771 | 0.979 |
| AKT1 | RXRG     | 9606.ENSP00000451828 | 9606.ENSP00000352900 | 0 | 0 | 0     | 0     | 0     | 0.085 | 0.9 | 0.079 | 0.908 |
| AKT1 | MTOR     | 9606.ENSP00000451828 | 9606.ENSP00000354558 | 0 | 0 | 0     | 0     | 0.08  | 0.872 | 0.9 | 0.972 | 0.999 |
| AKT1 | CHUK     | 9606.ENSP00000451828 | 9606.ENSP00000359424 | 0 | 0 | 0     | 0.593 | 0     | 0.682 | 0.9 | 0.673 | 0.975 |
| AKT1 | CD40LG   | 9606.ENSP00000451828 | 9606.ENSP00000359663 | 0 | 0 | 0     | 0     | 0     | 0.072 | 0.9 | 0.482 | 0.947 |
| AKT1 | JUN      | 9606.ENSP00000451828 | 9606.ENSP00000360266 | 0 | 0 | 0     | 0     | 0     | 0.072 | 0   | 0.91  | 0.913 |
| AKT1 | PTPN1    | 9606.ENSP00000451828 | 9606.ENSP00000360683 | 0 | 0 | 0     | 0     | 0.09  | 0.397 | 0.9 | 0.796 | 0.987 |
| AKT1 | AR       | 9606.ENSP00000451828 | 9606.ENSP00000363822 | 0 | 0 | 0     | 0     | 0     | 0.407 | 0   | 0.89  | 0.932 |
| AKT1 | BCL2     | 9606.ENSP00000451828 | 9606.ENSP00000381185 | 0 | 0 | 0     | 0     | 0.061 | 0     | 0.9 | 0.426 | 0.941 |
| AKT1 | CDKN1A   | 9606.ENSP00000451828 | 9606.ENSP00000384849 | 0 | 0 | 0     | 0     | 0     | 0.696 | 0.9 | 0.851 | 0.995 |
| AKT1 | ESR1     | 9606.ENSP00000451828 | 9606.ENSP00000405330 | 0 | 0 | 0     | 0     | 0.055 | 0.407 | 0.9 | 0.867 | 0.991 |
| AKT1 | RXRA     | 9606.ENSP00000451828 | 9606.ENSP00000419692 | 0 | 0 | 0     | 0     | 0.085 | 0.085 | 0.9 | 0.271 | 0.93  |
| AKT1 | PIK3R1   | 9606.ENSP00000451828 | 9606.ENSP00000428056 | 0 | 0 | 0     | 0     | 0.062 | 0.447 | 0.9 | 0.835 | 0.99  |



|        |          |                      |                      |   |   |       |       |       |       |     |       |       |
|--------|----------|----------------------|----------------------|---|---|-------|-------|-------|-------|-----|-------|-------|
| AKT1   | IKBKB    | 9606.ENSP00000451828 | 9606.ENSP00000430684 | 0 | 0 | 0     | 0.601 | 0     | 0.682 | 0.9 | 0.574 | 0.974 |
| AKT1   | HIF1A    | 9606.ENSP00000451828 | 9606.ENSP00000437955 | 0 | 0 | 0     | 0     | 0     | 0.362 | 0.9 | 0.827 | 0.988 |
| AKT1   | NR4A1    | 9606.ENSP00000451828 | 9606.ENSP00000440864 | 0 | 0 | 0     | 0     | 0     | 0.4   | 0.9 | 0.76  | 0.984 |
| AKT1   | VEGFA    | 9606.ENSP00000451828 | 9606.ENSP00000478570 | 0 | 0 | 0     | 0     | 0.063 | 0.342 | 0   | 0.95  | 0.966 |
| AKT1   | MYC      | 9606.ENSP00000451828 | 9606.ENSP00000479618 | 0 | 0 | 0     | 0     | 0.052 | 0.156 | 0.9 | 0.915 | 0.992 |
| ALK    | PIK3CA   | 9606.ENSP00000373700 | 9606.ENSP00000263967 | 0 | 0 | 0     | 0     | 0.058 | 0.124 | 0.8 | 0.736 | 0.95  |
| ALOX12 | ALOX15   | 9606.ENSP00000251535 | 9606.ENSP00000458832 | 0 | 0 | 0.407 | 0.97  | 0.061 | 0     | 0.9 | 0.709 | 0.905 |
| ALOX12 | ALOX5    | 9606.ENSP00000251535 | 9606.ENSP00000363512 | 0 | 0 | 0.386 | 0.911 | 0.063 | 0     | 0.9 | 0.863 | 0.912 |
| ALOX12 | PTGS2    | 9606.ENSP00000251535 | 9606.ENSP00000356438 | 0 | 0 | 0     | 0     | 0.061 | 0     | 0.9 | 0.526 | 0.951 |
| ALOX12 | PTGS1    | 9606.ENSP00000251535 | 9606.ENSP00000354612 | 0 | 0 | 0     | 0     | 0.107 | 0     | 0.9 | 0.57  | 0.958 |
| ALOX15 | CYP3A4   | 9606.ENSP00000458832 | 9606.ENSP00000337915 | 0 | 0 | 0     | 0     | 0     | 0     | 0.9 | 0.087 | 0.904 |
| ALOX15 | CYP1A2   | 9606.ENSP00000458832 | 9606.ENSP00000342007 | 0 | 0 | 0     | 0     | 0     | 0     | 0.9 | 0.057 | 0.901 |
| ALOX15 | PTGS1    | 9606.ENSP00000458832 | 9606.ENSP00000354612 | 0 | 0 | 0     | 0     | 0.061 | 0     | 0.9 | 0.594 | 0.958 |
| ALOX15 | PTGS2    | 9606.ENSP00000458832 | 9606.ENSP00000356438 | 0 | 0 | 0     | 0     | 0.061 | 0     | 0.9 | 0.601 | 0.959 |
| ALOX15 | ALOX5    | 9606.ENSP00000458832 | 9606.ENSP00000363512 | 0 | 0 | 0.298 | 0.905 | 0.062 | 0     | 0.9 | 0.891 | 0.912 |
| ALOX5  | PTGS1    | 9606.ENSP00000363512 | 9606.ENSP00000354612 | 0 | 0 | 0     | 0     | 0.095 | 0     | 0.9 | 0.728 | 0.973 |
| ALOX5  | PTGS2    | 9606.ENSP00000363512 | 9606.ENSP00000356438 | 0 | 0 | 0     | 0     | 0.08  | 0     | 0.9 | 0.758 | 0.975 |
| APP    | DRD4     | 9606.ENSP00000284981 | 9606.ENSP00000176183 | 0 | 0 | 0     | 0     | 0     | 0     | 0.9 | 0.251 | 0.921 |
| APP    | MAPK1    | 9606.ENSP00000284981 | 9606.ENSP00000215832 | 0 | 0 | 0     | 0     | 0.062 | 0.08  | 0.9 | 0.492 | 0.95  |
| APP    | SERPINE1 | 9606.ENSP00000284981 | 9606.ENSP00000223095 | 0 | 0 | 0     | 0     | 0     | 0     | 0.9 | 0.25  | 0.921 |
| APP    | TTR      | 9606.ENSP00000284981 | 9606.ENSP00000237014 | 0 | 0 | 0     | 0     | 0.063 | 0.379 | 0.9 | 0.546 | 0.97  |
| APP    | CHRM3    | 9606.ENSP00000284981 | 9606.ENSP00000255380 | 0 | 0 | 0     | 0     | 0.081 | 0     | 0.9 | 0.093 | 0.909 |
| APP    | PIK3CA   | 9606.ENSP00000284981 | 9606.ENSP00000263967 | 0 | 0 | 0     | 0     | 0     | 0     | 0.9 | 0.123 | 0.908 |
| APP    | EGF      | 9606.ENSP00000284981 | 9606.ENSP00000265171 | 0 | 0 | 0     | 0     | 0.061 | 0     | 0.9 | 0.51  | 0.949 |
| APP    | GCGR     | 9606.ENSP00000284981 | 9606.ENSP00000383558 | 0 | 0 | 0     | 0     | 0     | 0     | 0.9 | 0.054 | 0.901 |
| APP    | F2RL1    | 9606.ENSP00000284981 | 9606.ENSP00000296677 | 0 | 0 | 0     | 0     | 0     | 0     | 0.9 | 0.055 | 0.901 |

|     |          |                      |                      |   |   |   |       |       |       |     |       |       |
|-----|----------|----------------------|----------------------|---|---|---|-------|-------|-------|-----|-------|-------|
| APP | HTR1B    | 9606.ENSP00000284981 | 9606.ENSP00000358963 | 0 | 0 | 0 | 0     | 0.075 | 0     | 0.9 | 0.079 | 0.907 |
| APP | IGFBP3   | 9606.ENSP00000284981 | 9606.ENSP00000370473 | 0 | 0 | 0 | 0     | 0.088 | 0     | 0.9 | 0.146 | 0.915 |
| APP | PIK3R1   | 9606.ENSP00000284981 | 9606.ENSP00000428056 | 0 | 0 | 0 | 0     | 0     | 0     | 0.9 | 0.19  | 0.915 |
| APP | OPRM1    | 9606.ENSP00000284981 | 9606.ENSP00000394624 | 0 | 0 | 0 | 0     | 0     | 0     | 0.9 | 0.197 | 0.916 |
| APP | CNR2     | 9606.ENSP00000284981 | 9606.ENSP00000363596 | 0 | 0 | 0 | 0     | 0     | 0     | 0.9 | 0.195 | 0.916 |
| APP | CXCR2    | 9606.ENSP00000284981 | 9606.ENSP00000319635 | 0 | 0 | 0 | 0     | 0     | 0     | 0.9 | 0.211 | 0.917 |
| APP | SPP1     | 9606.ENSP00000284981 | 9606.ENSP00000378517 | 0 | 0 | 0 | 0     | 0.076 | 0     | 0.9 | 0.187 | 0.918 |
| APP | CXCL10   | 9606.ENSP00000284981 | 9606.ENSP00000305651 | 0 | 0 | 0 | 0     | 0     | 0     | 0.9 | 0.243 | 0.921 |
| APP | HTR2A    | 9606.ENSP00000284981 | 9606.ENSP00000437737 | 0 | 0 | 0 | 0     | 0.061 | 0     | 0.9 | 0.237 | 0.922 |
| APP | IGF2     | 9606.ENSP00000284981 | 9606.ENSP00000391826 | 0 | 0 | 0 | 0     | 0.066 | 0     | 0.9 | 0.315 | 0.93  |
| APP | DRD2     | 9606.ENSP00000284981 | 9606.ENSP00000354859 | 0 | 0 | 0 | 0     | 0.063 | 0     | 0.9 | 0.33  | 0.931 |
| APP | CXCL8    | 9606.ENSP00000284981 | 9606.ENSP00000306512 | 0 | 0 | 0 | 0     | 0     | 0     | 0.9 | 0.376 | 0.934 |
| APP | RELA     | 9606.ENSP00000284981 | 9606.ENSP00000384273 | 0 | 0 | 0 | 0     | 0     | 0     | 0.9 | 0.408 | 0.938 |
| APP | PLG      | 9606.ENSP00000284981 | 9606.ENSP00000308938 | 0 | 0 | 0 | 0     | 0     | 0.132 | 0.9 | 0.384 | 0.941 |
| APP | VEGFA    | 9606.ENSP00000284981 | 9606.ENSP00000478570 | 0 | 0 | 0 | 0     | 0.067 | 0     | 0.9 | 0.44  | 0.943 |
| APP | F2       | 9606.ENSP00000284981 | 9606.ENSP00000308541 | 0 | 0 | 0 | 0     | 0     | 0.132 | 0.9 | 0.413 | 0.944 |
| APP | MAPT     | 9606.ENSP00000284981 | 9606.ENSP00000340820 | 0 | 0 | 0 | 0     | 0.064 | 0.379 | 0   | 0.919 | 0.949 |
| APP | IL6      | 9606.ENSP00000284981 | 9606.ENSP00000385675 | 0 | 0 | 0 | 0     | 0     | 0     | 0.9 | 0.589 | 0.957 |
| APP | CASP8    | 9606.ENSP00000284981 | 9606.ENSP00000351273 | 0 | 0 | 0 | 0     | 0     | 0.379 | 0.9 | 0.39  | 0.958 |
| APP | MAPK8    | 9606.ENSP00000284981 | 9606.ENSP00000378974 | 0 | 0 | 0 | 0     | 0.052 | 0.294 | 0.9 | 0.791 | 0.984 |
| AR  | CCND1    | 9606.ENSP00000363822 | 9606.ENSP00000227507 | 0 | 0 | 0 | 0     | 0.061 | 0.384 | 0.9 | 0.795 | 0.986 |
| AR  | NR3C1    | 9606.ENSP00000363822 | 9606.ENSP00000231509 | 0 | 0 | 0 | 0.816 | 0     | 0.379 | 0.9 | 0.806 | 0.944 |
| AR  | PIK3CA   | 9606.ENSP00000363822 | 9606.ENSP00000263967 | 0 | 0 | 0 | 0     | 0     | 0     | 0.9 | 0.473 | 0.945 |
| AR  | GSK3B    | 9606.ENSP00000363822 | 9606.ENSP00000324806 | 0 | 0 | 0 | 0     | 0     | 0.407 | 0.9 | 0.49  | 0.967 |
| AR  | HSP90AA1 | 9606.ENSP00000363822 | 9606.ENSP00000335153 | 0 | 0 | 0 | 0     | 0     | 0.474 | 0.9 | 0.803 | 0.988 |
| AR  | NR3C2    | 9606.ENSP00000363822 | 9606.ENSP00000350815 | 0 | 0 | 0 | 0.779 | 0.061 | 0.379 | 0.9 | 0.67  | 0.945 |

|       |        |                      |                      |   |   |   |       |       |       |     |       |       |
|-------|--------|----------------------|----------------------|---|---|---|-------|-------|-------|-----|-------|-------|
| AR    | CASP8  | 9606.ENSP00000363822 | 9606.ENSP00000351273 | 0 | 0 | 0 | 0     | 0     | 0.472 | 0.9 | 0.399 | 0.965 |
| AR    | HSPA8  | 9606.ENSP00000363822 | 9606.ENSP00000432083 | 0 | 0 | 0 | 0     | 0     | 0.109 | 0.9 | 0.348 | 0.936 |
| AR    | MAPK8  | 9606.ENSP00000363822 | 9606.ENSP00000378974 | 0 | 0 | 0 | 0     | 0     | 0     | 0.9 | 0.479 | 0.945 |
| AR    | PIK3R1 | 9606.ENSP00000363822 | 9606.ENSP00000428056 | 0 | 0 | 0 | 0     | 0     | 0.153 | 0.9 | 0.517 | 0.955 |
| AR    | HSPA1A | 9606.ENSP00000363822 | 9606.ENSP00000364802 | 0 | 0 | 0 | 0     | 0     | 0.423 | 0.9 | 0.61  | 0.975 |
| BAX   | TP63   | 9606.ENSP00000293288 | 9606.ENSP00000264731 | 0 | 0 | 0 | 0     | 0     | 0     | 0.9 | 0.056 | 0.901 |
| BAX   | MAPK8  | 9606.ENSP00000293288 | 9606.ENSP00000378974 | 0 | 0 | 0 | 0     | 0     | 0.053 | 0.9 | 0.525 | 0.951 |
| BAX   | BCL2   | 9606.ENSP00000293288 | 9606.ENSP00000381185 | 0 | 0 | 0 | 0.645 | 0     | 0.58  | 0.9 | 0.734 | 0.967 |
| BCL2  | MAPK1  | 9606.ENSP00000381185 | 9606.ENSP00000215832 | 0 | 0 | 0 | 0     | 0     | 0.379 | 0.9 | 0.198 | 0.945 |
| BCL2  | STAT3  | 9606.ENSP00000381185 | 9606.ENSP00000264657 | 0 | 0 | 0 | 0     | 0     | 0.186 | 0.9 | 0.225 | 0.931 |
| BCL2  | CASP8  | 9606.ENSP00000381185 | 9606.ENSP00000351273 | 0 | 0 | 0 | 0     | 0     | 0.993 | 0   | 0.43  | 0.996 |
| BCL2  | RXRG   | 9606.ENSP00000381185 | 9606.ENSP00000352900 | 0 | 0 | 0 | 0     | 0     | 0.064 | 0.9 | 0     | 0.902 |
| BCL2  | MAPK8  | 9606.ENSP00000381185 | 9606.ENSP00000378974 | 0 | 0 | 0 | 0     | 0     | 0.386 | 0.9 | 0.29  | 0.952 |
| BCL2  | RXRA   | 9606.ENSP00000381185 | 9606.ENSP00000419692 | 0 | 0 | 0 | 0     | 0     | 0.064 | 0.9 | 0.046 | 0.902 |
| BCL2  | ESR1   | 9606.ENSP00000381185 | 9606.ENSP00000405330 | 0 | 0 | 0 | 0     | 0.069 | 0.064 | 0.9 | 0.244 | 0.925 |
| BCL2  | NR4A1  | 9606.ENSP00000381185 | 9606.ENSP00000440864 | 0 | 0 | 0 | 0     | 0     | 0.379 | 0.9 | 0.384 | 0.958 |
| BCL2  | MYC    | 9606.ENSP00000381185 | 9606.ENSP00000479618 | 0 | 0 | 0 | 0     | 0     | 0.456 | 0.9 | 0.407 | 0.965 |
| CASP3 | MAPK8  | 9606.ENSP00000311032 | 9606.ENSP00000378974 | 0 | 0 | 0 | 0     | 0.055 | 0.294 | 0   | 0.863 | 0.901 |
| CASP3 | ITGB1  | 9606.ENSP00000311032 | 9606.ENSP00000379350 | 0 | 0 | 0 | 0     | 0.062 | 0     | 0.9 | 0.416 | 0.94  |
| CASP3 | PRKCD  | 9606.ENSP00000311032 | 9606.ENSP00000378217 | 0 | 0 | 0 | 0     | 0     | 0     | 0.9 | 0.556 | 0.953 |
| CASP3 | PRKDC  | 9606.ENSP00000311032 | 9606.ENSP00000313420 | 0 | 0 | 0 | 0     | 0     | 0.395 | 0.9 | 0.474 | 0.965 |
| CASP3 | MAPT   | 9606.ENSP00000311032 | 9606.ENSP00000340820 | 0 | 0 | 0 | 0     | 0     | 0.379 | 0.9 | 0.539 | 0.968 |
| CASP3 | CASP9  | 9606.ENSP00000311032 | 9606.ENSP00000330237 | 0 | 0 | 0 | 0.833 | 0.061 | 0.682 | 0.9 | 0.971 | 0.972 |
| CASP3 | CDKN1A | 9606.ENSP00000311032 | 9606.ENSP00000384849 | 0 | 0 | 0 | 0     | 0     | 0.682 | 0.8 | 0.718 | 0.98  |
| CASP3 | PARP1  | 9606.ENSP00000311032 | 9606.ENSP00000355759 | 0 | 0 | 0 | 0     | 0.062 | 0.472 | 0.9 | 0.839 | 0.99  |
| CASP3 | CASP8  | 9606.ENSP00000311032 | 9606.ENSP00000351273 | 0 | 0 | 0 | 0.835 | 0.061 | 0.993 | 0.9 | 0.978 | 0.999 |

|       |          |                      |                      |   |   |   |       |       |       |     |       |       |
|-------|----------|----------------------|----------------------|---|---|---|-------|-------|-------|-----|-------|-------|
| CASP8 | MAPK1    | 9606.ENSP00000351273 | 9606.ENSP00000215832 | 0 | 0 | 0 | 0     | 0     | 0.482 | 0.9 | 0.778 | 0.987 |
| CASP8 | COL1A1   | 9606.ENSP00000351273 | 9606.ENSP00000225964 | 0 | 0 | 0 | 0     | 0     | 0     | 0.9 | 0.185 | 0.915 |
| CASP8 | IL1B     | 9606.ENSP00000351273 | 9606.ENSP00000263341 | 0 | 0 | 0 | 0     | 0.063 | 0.268 | 0.9 | 0.568 | 0.966 |
| CASP8 | COL3A1   | 9606.ENSP00000351273 | 9606.ENSP00000304408 | 0 | 0 | 0 | 0     | 0     | 0     | 0.9 | 0.216 | 0.918 |
| CASP8 | CASP9    | 9606.ENSP00000351273 | 9606.ENSP00000330237 | 0 | 0 | 0 | 0.707 | 0     | 0.993 | 0   | 0.956 | 0.994 |
| CASP8 | RELA     | 9606.ENSP00000351273 | 9606.ENSP00000384273 | 0 | 0 | 0 | 0     | 0.061 | 0     | 0.9 | 0.542 | 0.953 |
| CASP8 | CHUK     | 9606.ENSP00000351273 | 9606.ENSP00000359424 | 0 | 0 | 0 | 0     | 0     | 0.374 | 0.9 | 0.43  | 0.961 |
| CASP8 | IKBKB    | 9606.ENSP00000351273 | 9606.ENSP00000430684 | 0 | 0 | 0 | 0     | 0.061 | 0.374 | 0.9 | 0.447 | 0.963 |
| CASP8 | TNF      | 9606.ENSP00000351273 | 9606.ENSP00000398698 | 0 | 0 | 0 | 0     | 0.062 | 0.394 | 0.9 | 0.788 | 0.986 |
| CASP9 | PARP1    | 9606.ENSP00000330237 | 9606.ENSP00000355759 | 0 | 0 | 0 | 0     | 0.061 | 0.126 | 0.8 | 0.743 | 0.952 |
| CAV1  | EGF      | 9606.ENSP00000339191 | 9606.ENSP00000265171 | 0 | 0 | 0 | 0     | 0     | 0     | 0.9 | 0.746 | 0.973 |
| CAV1  | EGFR     | 9606.ENSP00000339191 | 9606.ENSP00000275493 | 0 | 0 | 0 | 0     | 0.335 | 0.393 | 0.9 | 0.844 | 0.992 |
| CAV1  | NOS3     | 9606.ENSP00000339191 | 9606.ENSP00000297494 | 0 | 0 | 0 | 0     | 0     | 0.379 | 0.9 | 0.915 | 0.994 |
| CAV1  | INSR     | 9606.ENSP00000339191 | 9606.ENSP00000303830 | 0 | 0 | 0 | 0     | 0     | 0.437 | 0.9 | 0.249 | 0.954 |
| CAV1  | GSK3B    | 9606.ENSP00000339191 | 9606.ENSP00000324806 | 0 | 0 | 0 | 0     | 0     | 0.057 | 0.9 | 0.282 | 0.926 |
| CAV1  | HSP90AA1 | 9606.ENSP00000339191 | 9606.ENSP00000335153 | 0 | 0 | 0 | 0     | 0     | 0.294 | 0.9 | 0.708 | 0.977 |
| CAV1  | ITGB1    | 9606.ENSP00000339191 | 9606.ENSP00000379350 | 0 | 0 | 0 | 0     | 0.132 | 0     | 0.9 | 0.392 | 0.942 |
| CAV1  | PTPN1    | 9606.ENSP00000339191 | 9606.ENSP00000360683 | 0 | 0 | 0 | 0     | 0     | 0.379 | 0.9 | 0.268 | 0.95  |
| CAV1  | TNF      | 9606.ENSP00000339191 | 9606.ENSP00000398698 | 0 | 0 | 0 | 0     | 0     | 0.348 | 0.9 | 0.507 | 0.965 |
| CCL2  | VEGFA    | 9606.ENSP00000225831 | 9606.ENSP00000478570 | 0 | 0 | 0 | 0     | 0     | 0     | 0   | 0.914 | 0.914 |
| CCL2  | ICAM1    | 9606.ENSP00000225831 | 9606.ENSP00000264832 | 0 | 0 | 0 | 0     | 0.149 | 0     | 0   | 0.919 | 0.929 |
| CCL2  | RELA     | 9606.ENSP00000225831 | 9606.ENSP00000384273 | 0 | 0 | 0 | 0     | 0     | 0.379 | 0.8 | 0.555 | 0.939 |
| CCL2  | VCAM1    | 9606.ENSP00000225831 | 9606.ENSP00000294728 | 0 | 0 | 0 | 0     | 0.206 | 0     | 0   | 0.927 | 0.94  |
| CCL2  | CXCL10   | 9606.ENSP00000225831 | 9606.ENSP00000305651 | 0 | 0 | 0 | 0     | 0.158 | 0     | 0   | 0.933 | 0.941 |
| CCL2  | IL1B     | 9606.ENSP00000225831 | 9606.ENSP00000263341 | 0 | 0 | 0 | 0     | 0.126 | 0     | 0   | 0.945 | 0.95  |
| CCL2  | FOS      | 9606.ENSP00000225831 | 9606.ENSP00000306245 | 0 | 0 | 0 | 0     | 0     | 0     | 0.9 | 0.719 | 0.97  |

|        |        |                      |                      |   |   |   |   |       |       |     |       |       |
|--------|--------|----------------------|----------------------|---|---|---|---|-------|-------|-----|-------|-------|
| CCL2   | TNF    | 9606.ENSP00000225831 | 9606.ENSP00000398698 | 0 | 0 | 0 | 0 | 0.062 | 0     | 0   | 0.969 | 0.971 |
| CCL2   | JUN    | 9606.ENSP00000225831 | 9606.ENSP00000360266 | 0 | 0 | 0 | 0 | 0.062 | 0     | 0.9 | 0.792 | 0.978 |
| CCL2   | CXCL8  | 9606.ENSP00000225831 | 9606.ENSP00000306512 | 0 | 0 | 0 | 0 | 0.278 | 0.667 | 0   | 0.925 | 0.98  |
| CCL2   | STAT3  | 9606.ENSP00000225831 | 9606.ENSP00000264657 | 0 | 0 | 0 | 0 | 0     | 0     | 0.9 | 0.824 | 0.981 |
| CCL2   | IL6    | 9606.ENSP00000225831 | 9606.ENSP00000385675 | 0 | 0 | 0 | 0 | 0.267 | 0     | 0   | 0.977 | 0.982 |
| CCL2   | IL10   | 9606.ENSP00000225831 | 9606.ENSP00000412237 | 0 | 0 | 0 | 0 | 0     | 0     | 0.9 | 0.955 | 0.995 |
| CCNC   | FABP4  | 9606.ENSP00000428982 | 9606.ENSP00000256104 | 0 | 0 | 0 | 0 | 0     | 0     | 0.9 | 0.064 | 0.902 |
| CCNC   | PPARG  | 9606.ENSP00000428982 | 9606.ENSP00000287820 | 0 | 0 | 0 | 0 | 0     | 0.085 | 0.9 | 0.056 | 0.906 |
| CCNC   | SLC2A4 | 9606.ENSP00000428982 | 9606.ENSP00000320935 | 0 | 0 | 0 | 0 | 0     | 0     | 0.9 | 0     | 0.900 |
| CCNC   | CDK8   | 9606.ENSP00000428982 | 9606.ENSP00000370938 | 0 | 0 | 0 | 0 | 0.168 | 0.952 | 0.9 | 0.985 | 0.999 |
| CCNC   | RXRA   | 9606.ENSP00000428982 | 9606.ENSP00000419692 | 0 | 0 | 0 | 0 | 0.061 | 0.13  | 0.9 | 0     | 0.911 |
| CCND1  | IGF2   | 9606.ENSP00000227507 | 9606.ENSP00000391826 | 0 | 0 | 0 | 0 | 0.092 | 0     | 0   | 0.901 | 0.907 |
| CCND1  | EGFR   | 9606.ENSP00000227507 | 9606.ENSP00000275493 | 0 | 0 | 0 | 0 | 0.2   | 0.157 | 0   | 0.886 | 0.917 |
| CCND1  | MYC    | 9606.ENSP00000227507 | 9606.ENSP00000479618 | 0 | 0 | 0 | 0 | 0.069 | 0     | 0   | 0.963 | 0.964 |
| CCND1  | FOS    | 9606.ENSP00000227507 | 9606.ENSP00000306245 | 0 | 0 | 0 | 0 | 0     | 0     | 0.9 | 0.685 | 0.967 |
| CCND1  | RELA   | 9606.ENSP00000227507 | 9606.ENSP00000384273 | 0 | 0 | 0 | 0 | 0     | 0.313 | 0.9 | 0.559 | 0.967 |
| CCND1  | E2F1   | 9606.ENSP00000227507 | 9606.ENSP00000345571 | 0 | 0 | 0 | 0 | 0.064 | 0.132 | 0.9 | 0.713 | 0.973 |
| CCND1  | JUN    | 9606.ENSP00000227507 | 9606.ENSP00000360266 | 0 | 0 | 0 | 0 | 0     | 0     | 0.9 | 0.862 | 0.985 |
| CCND1  | GSK3B  | 9606.ENSP00000227507 | 9606.ENSP00000324806 | 0 | 0 | 0 | 0 | 0     | 0.526 | 0.9 | 0.822 | 0.990 |
| CCND1  | ESR1   | 9606.ENSP00000227507 | 9606.ENSP00000405330 | 0 | 0 | 0 | 0 | 0     | 0.384 | 0.9 | 0.858 | 0.990 |
| CCND1  | STAT3  | 9606.ENSP00000227507 | 9606.ENSP00000264657 | 0 | 0 | 0 | 0 | 0.049 | 0.457 | 0.9 | 0.894 | 0.993 |
| CCND1  | CDKN1A | 9606.ENSP00000227507 | 9606.ENSP00000384849 | 0 | 0 | 0 | 0 | 0.084 | 0.993 | 0.9 | 0.857 | 0.999 |
| CD40LG | PIK3CA | 9606.ENSP00000359663 | 9606.ENSP00000263967 | 0 | 0 | 0 | 0 | 0     | 0.05  | 0.9 | 0.064 | 0.903 |
| CD40LG | PIK3CG | 9606.ENSP00000359663 | 9606.ENSP00000352121 | 0 | 0 | 0 | 0 | 0.088 | 0.05  | 0.9 | 0.19  | 0.920 |
| CD40LG | PIK3R1 | 9606.ENSP00000359663 | 9606.ENSP00000428056 | 0 | 0 | 0 | 0 | 0     | 0.057 | 0.9 | 0.222 | 0.920 |
| CD40LG | RELA   | 9606.ENSP00000359663 | 9606.ENSP00000384273 | 0 | 0 | 0 | 0 | 0     | 0     | 0.9 | 0.477 | 0.945 |

|        |          |                      |                      |   |       |   |       |       |       |     |       |       |
|--------|----------|----------------------|----------------------|---|-------|---|-------|-------|-------|-----|-------|-------|
| CD40LG | MAPK8    | 9606.ENSP00000359663 | 9606.ENSP00000378974 | 0 | 0     | 0 | 0     | 0     | 0.076 | 0.9 | 0.473 | 0.947 |
| CD40LG | TNF      | 9606.ENSP00000359663 | 9606.ENSP00000398698 | 0 | 0     | 0 | 0     | 0.076 | 0     | 0.9 | 0.8   | 0.979 |
| CDK8   | FABP4    | 9606.ENSP00000370938 | 9606.ENSP00000256104 | 0 | 0     | 0 | 0     | 0     | 0     | 0.9 | 0     | 0.900 |
| CDK8   | PPARG    | 9606.ENSP00000370938 | 9606.ENSP00000287820 | 0 | 0     | 0 | 0     | 0     | 0.077 | 0.9 | 0.239 | 0.923 |
| CDK8   | SLC2A4   | 9606.ENSP00000370938 | 9606.ENSP00000320935 | 0 | 0     | 0 | 0     | 0     | 0     | 0.9 | 0     | 0.900 |
| CDK8   | RXRA     | 9606.ENSP00000370938 | 9606.ENSP00000419692 | 0 | 0     | 0 | 0     | 0     | 0.126 | 0.9 | 0.05  | 0.909 |
| CDKN1A | STAT3    | 9606.ENSP00000384849 | 9606.ENSP00000264657 | 0 | 0     | 0 | 0     | 0.074 | 0.513 | 0.9 | 0.547 | 0.976 |
| CDKN1A | HSP90AA1 | 9606.ENSP00000384849 | 9606.ENSP00000335153 | 0 | 0     | 0 | 0     | 0     | 0.379 | 0.9 | 0.43  | 0.961 |
| CDKN1A | E2F1     | 9606.ENSP00000384849 | 9606.ENSP00000345571 | 0 | 0     | 0 | 0     | 0.052 | 0.435 | 0.9 | 0.617 | 0.976 |
| CDKN1A | JUN      | 9606.ENSP00000384849 | 9606.ENSP00000360266 | 0 | 0     | 0 | 0     | 0.079 | 0.305 | 0.9 | 0.743 | 0.981 |
| CDKN1A | MAPK8    | 9606.ENSP00000384849 | 9606.ENSP00000378974 | 0 | 0     | 0 | 0     | 0     | 0.379 | 0.9 | 0.593 | 0.972 |
| CDKN1A | HIF1A    | 9606.ENSP00000384849 | 9606.ENSP00000437955 | 0 | 0     | 0 | 0     | 0     | 0     | 0.9 | 0.399 | 0.937 |
| CDKN1A | MYC      | 9606.ENSP00000384849 | 9606.ENSP00000479618 | 0 | 0     | 0 | 0     | 0     | 0.378 | 0.9 | 0.945 | 0.996 |
| CES1   | MPO      | 9606.ENSP00000353720 | 9606.ENSP00000225275 | 0 | 0     | 0 | 0     | 0     | 0.07  | 0.9 | 0.295 | 0.928 |
| CES1   | CYP3A4   | 9606.ENSP00000353720 | 9606.ENSP00000337915 | 0 | 0.003 | 0 | 0     | 0.061 | 0     | 0.9 | 0.593 | 0.958 |
| CES2   | CYP3A4   | 9606.ENSP00000317842 | 9606.ENSP00000337915 | 0 | 0.002 | 0 | 0     | 0.054 | 0     | 0.9 | 0.58  | 0.956 |
| CFTR   | IGF2R    | 9606.ENSP00000003084 | 9606.ENSP00000349437 | 0 | 0     | 0 | 0     | 0     | 0     | 0.9 | 0.218 | 0.918 |
| CFTR   | F2       | 9606.ENSP00000003084 | 9606.ENSP00000308541 | 0 | 0     | 0 | 0     | 0     | 0     | 0.9 | 0.246 | 0.921 |
| CFTR   | EGF      | 9606.ENSP00000003084 | 9606.ENSP00000265171 | 0 | 0     | 0 | 0     | 0     | 0     | 0.9 | 0.384 | 0.935 |
| CFTR   | EGFR     | 9606.ENSP00000003084 | 9606.ENSP00000275493 | 0 | 0     | 0 | 0     | 0     | 0.051 | 0.9 | 0.383 | 0.936 |
| CFTR   | HSPA8    | 9606.ENSP00000003084 | 9606.ENSP00000432083 | 0 | 0     | 0 | 0     | 0.062 | 0.404 | 0.9 | 0.562 | 0.972 |
| CHRM3  | F2       | 9606.ENSP00000255380 | 9606.ENSP00000308541 | 0 | 0     | 0 | 0     | 0     | 0     | 0.9 | 0.041 | 0.900 |
| CHRM3  | PIK3CA   | 9606.ENSP00000255380 | 9606.ENSP00000263967 | 0 | 0     | 0 | 0     | 0     | 0     | 0.9 | 0.049 | 0.900 |
| CHRM3  | PIK3R1   | 9606.ENSP00000255380 | 9606.ENSP00000428056 | 0 | 0     | 0 | 0     | 0     | 0     | 0.9 | 0     | 0.900 |
| CHRM3  | GCGR     | 9606.ENSP00000255380 | 9606.ENSP00000383558 | 0 | 0     | 0 | 0     | 0     | 0     | 0.9 | 0.096 | 0.905 |
| CHRM3  | HTR2A    | 9606.ENSP00000255380 | 9606.ENSP00000437737 | 0 | 0     | 0 | 0.627 | 0.081 | 0     | 0.9 | 0.318 | 0.914 |

|        |        |                      |                      |   |   |       |       |       |       |     |       |       |
|--------|--------|----------------------|----------------------|---|---|-------|-------|-------|-------|-----|-------|-------|
| CHRM3  | F2RL1  | 9606.ENSP00000255380 | 9606.ENSP00000296677 | 0 | 0 | 0     | 0     | 0     | 0     | 0.9 | 0.199 | 0.916 |
| CHUK   | IL1A   | 9606.ENSP00000359424 | 9606.ENSP00000263339 | 0 | 0 | 0     | 0     | 0.061 | 0     | 0.9 | 0.22  | 0.920 |
| CHUK   | PRKCB  | 9606.ENSP00000359424 | 9606.ENSP00000305355 | 0 | 0 | 0     | 0.565 | 0     | 0.717 | 0.9 | 0.254 | 0.973 |
| CHUK   | PRKCE  | 9606.ENSP00000359424 | 9606.ENSP00000306124 | 0 | 0 | 0     | 0.557 | 0.062 | 0.071 | 0.9 | 0.231 | 0.913 |
| CHUK   | MTOR   | 9606.ENSP00000359424 | 9606.ENSP00000354558 | 0 | 0 | 0     | 0     | 0.058 | 0.882 | 0   | 0.197 | 0.903 |
| CHUK   | PRKCA  | 9606.ENSP00000359424 | 9606.ENSP00000408695 | 0 | 0 | 0     | 0.568 | 0     | 0.358 | 0.9 | 0.31  | 0.941 |
| CHUK   | TNF    | 9606.ENSP00000359424 | 9606.ENSP00000398698 | 0 | 0 | 0     | 0     | 0.061 | 0.374 | 0.9 | 0.592 | 0.972 |
| CHUK   | IKBKB  | 9606.ENSP00000359424 | 9606.ENSP00000430684 | 0 | 0 | 0     | 0.942 | 0     | 0.91  | 0.9 | 0.953 | 0.991 |
| CHUK   | RELA   | 9606.ENSP00000359424 | 9606.ENSP00000384273 | 0 | 0 | 0     | 0     | 0.067 | 0.871 | 0.9 | 0.705 | 0.995 |
| CNR2   | DRD4   | 9606.ENSP00000363596 | 9606.ENSP00000176183 | 0 | 0 | 0     | 0     | 0     | 0     | 0.9 | 0.513 | 0.949 |
| CNR2   | CXCL10 | 9606.ENSP00000363596 | 9606.ENSP00000305651 | 0 | 0 | 0     | 0     | 0     | 0     | 0.9 | 0.14  | 0.910 |
| CNR2   | CXCL8  | 9606.ENSP00000363596 | 9606.ENSP00000306512 | 0 | 0 | 0     | 0     | 0     | 0     | 0.9 | 0.25  | 0.921 |
| CNR2   | CXCR2  | 9606.ENSP00000363596 | 9606.ENSP00000319635 | 0 | 0 | 0     | 0     | 0.087 | 0     | 0.9 | 0.094 | 0.910 |
| CNR2   | DRD2   | 9606.ENSP00000363596 | 9606.ENSP00000354859 | 0 | 0 | 0     | 0     | 0     | 0     | 0.9 | 0.534 | 0.951 |
| CNR2   | HTR1B  | 9606.ENSP00000363596 | 9606.ENSP00000358963 | 0 | 0 | 0     | 0.582 | 0     | 0     | 0.9 | 0.167 | 0.905 |
| CNR2   | OPRM1  | 9606.ENSP00000363596 | 9606.ENSP00000394624 | 0 | 0 | 0     | 0.567 | 0.063 | 0     | 0.9 | 0.669 | 0.929 |
| COL1A1 | MMP2   | 9606.ENSP00000225964 | 9606.ENSP00000219070 | 0 | 0 | 0     | 0     | 0.89  | 0.379 | 0   | 0.6   | 0.970 |
| COL1A1 | MSR1   | 9606.ENSP00000225964 | 9606.ENSP00000262101 | 0 | 0 | 0     | 0.595 | 0     | 0     | 0.9 | 0.187 | 0.906 |
| COL1A1 | ITGB1  | 9606.ENSP00000225964 | 9606.ENSP00000379350 | 0 | 0 | 0     | 0     | 0.096 | 0.379 | 0.9 | 0.52  | 0.969 |
| COL1A1 | COL3A1 | 9606.ENSP00000225964 | 9606.ENSP00000304408 | 0 | 0 | 0.439 | 0.951 | 0.944 | 0     | 0.9 | 0.901 | 0.994 |
| COL3A1 | MSR1   | 9606.ENSP00000304408 | 9606.ENSP00000262101 | 0 | 0 | 0     | 0.587 | 0.097 | 0     | 0.9 | 0.079 | 0.907 |
| COL3A1 | ITGB1  | 9606.ENSP00000304408 | 9606.ENSP00000379350 | 0 | 0 | 0     | 0     | 0.09  | 0     | 0.9 | 0.405 | 0.941 |
| CPB2   | PLG    | 9606.ENSP00000181383 | 9606.ENSP00000308938 | 0 | 0 | 0     | 0     | 0.326 | 0.432 | 0   | 0.799 | 0.916 |
| CPB2   | F2     | 9606.ENSP00000181383 | 9606.ENSP00000308541 | 0 | 0 | 0     | 0     | 0.605 | 0.432 | 0.9 | 0.7   | 0.992 |
| CPT1A  | RELA   | 9606.ENSP00000265641 | 9606.ENSP00000384273 | 0 | 0 | 0     | 0     | 0     | 0     | 0.9 | 0.041 | 0.900 |
| CPT1A  | JUN    | 9606.ENSP00000265641 | 9606.ENSP00000360266 | 0 | 0 | 0     | 0     | 0     | 0     | 0.9 | 0.145 | 0.91  |

|        |       |                      |                      |   |   |   |   |       |      |     |       |       |
|--------|-------|----------------------|----------------------|---|---|---|---|-------|------|-----|-------|-------|
| CPT1A  | RXRA  | 9606.ENSP00000265641 | 9606.ENSP00000419692 | 0 | 0 | 0 | 0 | 0.062 | 0.05 | 0.9 | 0.345 | 0.933 |
| CPT1A  | FABP1 | 9606.ENSP00000265641 | 9606.ENSP00000295834 | 0 | 0 | 0 | 0 | 0.061 | 0    | 0.9 | 0.592 | 0.958 |
| CPT1A  | PPARA | 9606.ENSP00000265641 | 9606.ENSP00000385523 | 0 | 0 | 0 | 0 | 0.062 | 0.05 | 0.9 | 0.751 | 0.974 |
| CRP    | CXCL8 | 9606.ENSP00000255030 | 9606.ENSP00000306512 | 0 | 0 | 0 | 0 | 0     | 0    | 0   | 0.909 | 0.909 |
| CRP    | IL6   | 9606.ENSP00000255030 | 9606.ENSP00000385675 | 0 | 0 | 0 | 0 | 0     | 0    | 0   | 0.97  | 0.970 |
| CTSB   | CTSD  | 9606.ENSP00000345672 | 9606.ENSP00000236671 | 0 | 0 | 0 | 0 | 0.228 | 0.45 | 0   | 0.936 | 0.970 |
| CTSD   | TPO   | 9606.ENSP00000236671 | 9606.ENSP00000318820 | 0 | 0 | 0 | 0 | 0.088 | 0    | 0.9 | 0.046 | 0.905 |
| CTSD   | HPSE  | 9606.ENSP00000236671 | 9606.ENSP00000384262 | 0 | 0 | 0 | 0 | 0     | 0    | 0.9 | 0.112 | 0.907 |
| CTSD   | SLPI  | 9606.ENSP00000236671 | 9606.ENSP00000342082 | 0 | 0 | 0 | 0 | 0.072 | 0    | 0.9 | 0.158 | 0.915 |
| CTSD   | MMP9  | 9606.ENSP00000236671 | 9606.ENSP00000361405 | 0 | 0 | 0 | 0 | 0.08  | 0    | 0.9 | 0.445 | 0.944 |
| CTSD   | ESR1  | 9606.ENSP00000236671 | 9606.ENSP00000405330 | 0 | 0 | 0 | 0 | 0.087 | 0    | 0.9 | 0.587 | 0.959 |
| CTSD   | CTSS  | 9606.ENSP00000236671 | 9606.ENSP00000357981 | 0 | 0 | 0 | 0 | 0.063 | 0.08 | 0.9 | 0.589 | 0.959 |
| CTSS   | MMP9  | 9606.ENSP00000357981 | 9606.ENSP00000361405 | 0 | 0 | 0 | 0 | 0.134 | 0    | 0.9 | 0.319 | 0.935 |
| CXCL10 | DRD4  | 9606.ENSP00000305651 | 9606.ENSP00000176183 | 0 | 0 | 0 | 0 | 0     | 0    | 0.9 | 0     | 0.900 |
| CXCL10 | IFNG  | 9606.ENSP00000305651 | 9606.ENSP00000229135 | 0 | 0 | 0 | 0 | 0.118 | 0    | 0   | 0.893 | 0.902 |
| CXCL10 | STAT3 | 9606.ENSP00000305651 | 9606.ENSP00000264657 | 0 | 0 | 0 | 0 | 0     | 0    | 0.9 | 0.736 | 0.972 |
| CXCL10 | HTR1B | 9606.ENSP00000305651 | 9606.ENSP00000358963 | 0 | 0 | 0 | 0 | 0     | 0    | 0.9 | 0     | 0.900 |
| CXCL10 | DRD2  | 9606.ENSP00000305651 | 9606.ENSP00000354859 | 0 | 0 | 0 | 0 | 0     | 0    | 0.9 | 0.064 | 0.902 |
| CXCL10 | OPRM1 | 9606.ENSP00000305651 | 9606.ENSP00000394624 | 0 | 0 | 0 | 0 | 0     | 0    | 0.9 | 0.14  | 0.910 |
| CXCL10 | STAT1 | 9606.ENSP00000305651 | 9606.ENSP00000354394 | 0 | 0 | 0 | 0 | 0.707 | 0    | 0   | 0.84  | 0.951 |
| CXCL10 | CXCR2 | 9606.ENSP00000305651 | 9606.ENSP00000319635 | 0 | 0 | 0 | 0 | 0     | 0    | 0.9 | 0.672 | 0.965 |
| CXCL10 | CXCL8 | 9606.ENSP00000305651 | 9606.ENSP00000306512 | 0 | 0 | 0 | 0 | 0.144 | 0    | 0.9 | 0.869 | 0.987 |
| CXCL10 | IL10  | 9606.ENSP00000305651 | 9606.ENSP00000412237 | 0 | 0 | 0 | 0 | 0.083 | 0    | 0.9 | 0.913 | 0.991 |
| CXCL8  | DRD4  | 9606.ENSP00000306512 | 9606.ENSP00000176183 | 0 | 0 | 0 | 0 | 0     | 0    | 0.9 | 0.136 | 0.909 |
| CXCL8  | IL1B  | 9606.ENSP00000306512 | 9606.ENSP00000263341 | 0 | 0 | 0 | 0 | 0.676 | 0    | 0   | 0.977 | 0.992 |
| CXCL8  | STAT3 | 9606.ENSP00000306512 | 9606.ENSP00000264657 | 0 | 0 | 0 | 0 | 0     | 0    | 0.9 | 0.838 | 0.983 |



|         |         |                      |                      |   |   |       |       |       |       |      |       |       |
|---------|---------|----------------------|----------------------|---|---|-------|-------|-------|-------|------|-------|-------|
| CXCL8   | ICAM1   | 9606.ENSP00000306512 | 9606.ENSP00000264832 | 0 | 0 | 0     | 0     | 0.214 | 0     | 0    | 0.912 | 0.928 |
| CXCL8   | HTR1B   | 9606.ENSP00000306512 | 9606.ENSP00000358963 | 0 | 0 | 0     | 0     | 0     | 0     | 0.9  | 0.07  | 0.903 |
| CXCL8   | DRD2    | 9606.ENSP00000306512 | 9606.ENSP00000354859 | 0 | 0 | 0     | 0     | 0     | 0     | 0.9  | 0.167 | 0.913 |
| CXCL8   | OPRM1   | 9606.ENSP00000306512 | 9606.ENSP00000394624 | 0 | 0 | 0     | 0     | 0     | 0     | 0.9  | 0.293 | 0.926 |
| CXCL8   | MMP9    | 9606.ENSP00000306512 | 9606.ENSP00000361405 | 0 | 0 | 0     | 0     | 0.134 | 0.379 | 0    | 0.885 | 0.933 |
| CXCL8   | VEGFA   | 9606.ENSP00000306512 | 9606.ENSP00000478570 | 0 | 0 | 0     | 0     | 0.065 | 0     | 0    | 0.953 | 0.954 |
| CXCL8   | PTGS2   | 9606.ENSP00000306512 | 9606.ENSP00000356438 | 0 | 0 | 0     | 0     | 0.753 | 0     | 0    | 0.839 | 0.958 |
| CXCL8   | JUN     | 9606.ENSP00000306512 | 9606.ENSP00000360266 | 0 | 0 | 0     | 0     | 0.095 | 0.294 | 0.8  | 0.799 | 0.971 |
| CXCL8   | TNF     | 9606.ENSP00000306512 | 9606.ENSP00000398698 | 0 | 0 | 0     | 0     | 0.156 | 0     | 0    | 0.97  | 0.973 |
| CXCL8   | IL6     | 9606.ENSP00000306512 | 9606.ENSP00000385675 | 0 | 0 | 0     | 0     | 0.581 | 0     | 0    | 0.966 | 0.985 |
| CXCL8   | RELA    | 9606.ENSP00000306512 | 9606.ENSP00000384273 | 0 | 0 | 0     | 0     | 0.065 | 0.342 | 0.9  | 0.817 | 0.987 |
| CXCL8   | IL10    | 9606.ENSP00000306512 | 9606.ENSP00000412237 | 0 | 0 | 0     | 0     | 0.061 | 0     | 0.9  | 0.962 | 0.996 |
| CXCL8   | CXCR2   | 9606.ENSP00000306512 | 9606.ENSP00000319635 | 0 | 0 | 0     | 0     | 0.064 | 0.667 | 0.9  | 0.937 | 0.997 |
| CXCR2   | DRD4    | 9606.ENSP00000319635 | 9606.ENSP00000176183 | 0 | 0 | 0     | 0.576 | 0     | 0     | 0.9  | 0.053 | 0.900 |
| CXCR2   | HTR1B   | 9606.ENSP00000319635 | 9606.ENSP00000358963 | 0 | 0 | 0     | 0.568 | 0     | 0     | 0.9  | 0.064 | 0.901 |
| CXCR2   | DRD2    | 9606.ENSP00000319635 | 9606.ENSP00000354859 | 0 | 0 | 0     | 0.57  | 0     | 0     | 0.9  | 0.073 | 0.901 |
| CXCR2   | OPRM1   | 9606.ENSP00000319635 | 9606.ENSP00000394624 | 0 | 0 | 0     | 0.739 | 0     | 0     | 0.9  | 0.355 | 0.908 |
| CYP19A1 | SULT1E1 | 9606.ENSP00000379683 | 9606.ENSP00000226444 | 0 | 0 | 0     | 0     | 0     | 0     | 0.9  | 0.64  | 0.962 |
| CYP19A1 | CYP3A4  | 9606.ENSP00000379683 | 9606.ENSP00000337915 | 0 | 0 | 0.419 | 0.577 | 0     | 0     | 0.9  | 0.609 | 0.937 |
| CYP19A1 | CYP1A1  | 9606.ENSP00000379683 | 9606.ENSP00000369050 | 0 | 0 | 0.409 | 0.563 | 0     | 0     | 0.9  | 0.68  | 0.941 |
| CYP19A1 | ESR1    | 9606.ENSP00000379683 | 9606.ENSP00000405330 | 0 | 0 | 0     | 0     | 0     | 0.085 | 0    | 0.96  | 0.962 |
| CYP1A1  | SULT1E1 | 9606.ENSP00000369050 | 9606.ENSP00000226444 | 0 | 0 | 0     | 0     | 0.063 | 0     | 0.9  | 0.445 | 0.943 |
| CYP1A1  | FABP1   | 9606.ENSP00000369050 | 9606.ENSP00000295834 | 0 | 0 | 0     | 0     | 0.129 | 0     | 0.9  | 0.108 | 0.915 |
| CYP1A1  | CYP2A6  | 9606.ENSP00000369050 | 9606.ENSP00000301141 | 0 | 0 | 0.434 | 0.815 | 0.087 | 0     | 0.9  | 0.802 | 0.924 |
| CYP1A1  | GSTM1   | 9606.ENSP00000369050 | 9606.ENSP00000311469 | 0 | 0 | 0     | 0     | 0.061 | 0.077 | 0.65 | 0.892 | 0.962 |
| CYP1A1  | CYP3A4  | 9606.ENSP00000369050 | 9606.ENSP00000337915 | 0 | 0 | 0.443 | 0.605 | 0.129 | 0     | 0.9  | 0.895 | 0.95  |

|        |         |                      |                      |   |   |       |       |       |       |      |       |       |
|--------|---------|----------------------|----------------------|---|---|-------|-------|-------|-------|------|-------|-------|
| CYP1A1 | CYP2D6  | 9606.ENSP00000369050 | 9606.ENSP00000353820 | 0 | 0 | 0.41  | 0.809 | 0.062 | 0     | 0.9  | 0.837 | 0.923 |
| CYP1A1 | HSD11B1 | 9606.ENSP00000369050 | 9606.ENSP00000355995 | 0 | 0 | 0     | 0     | 0.145 | 0.131 | 0.9  | 0.17  | 0.930 |
| CYP1A1 | GSTP1   | 9606.ENSP00000369050 | 9606.ENSP00000381607 | 0 | 0 | 0     | 0     | 0     | 0.077 | 0.65 | 0.738 | 0.908 |
| CYP1A1 | RXRA    | 9606.ENSP00000369050 | 9606.ENSP00000419692 | 0 | 0 | 0     | 0     | 0.051 | 0.085 | 0.9  | 0.212 | 0.922 |
| CYP1A1 | PPARA   | 9606.ENSP00000369050 | 9606.ENSP00000385523 | 0 | 0 | 0     | 0     | 0.063 | 0.085 | 0.9  | 0.359 | 0.937 |
| CYP1A2 | CYP2A6  | 9606.ENSP00000342007 | 9606.ENSP00000301141 | 0 | 0 | 0.435 | 0.776 | 0.108 | 0     | 0.9  | 0.912 | 0.932 |
| CYP1A2 | CYP3A4  | 9606.ENSP00000342007 | 9606.ENSP00000337915 | 0 | 0 | 0.442 | 0.604 | 0.139 | 0     | 0.9  | 0.935 | 0.952 |
| CYP1A2 | XDH     | 9606.ENSP00000342007 | 9606.ENSP00000368727 | 0 | 0 | 0     | 0     | 0.061 | 0     | 0.9  | 0.096 | 0.907 |
| CYP1A2 | NR1I3   | 9606.ENSP00000342007 | 9606.ENSP00000356959 | 0 | 0 | 0     | 0     | 0.076 | 0.085 | 0.9  | 0.646 | 0.966 |
| CYP2A6 | HSD11B1 | 9606.ENSP00000301141 | 9606.ENSP00000355995 | 0 | 0 | 0     | 0     | 0.11  | 0.134 | 0.9  | 0.081 | 0.919 |
| CYP2A6 | CYP2D6  | 9606.ENSP00000301141 | 9606.ENSP00000353820 | 0 | 0 | 0.422 | 0.87  | 0.107 | 0     | 0.9  | 0.913 | 0.922 |
| CYP2A6 | CYP3A4  | 9606.ENSP00000301141 | 9606.ENSP00000337915 | 0 | 0 | 0.44  | 0.633 | 0.14  | 0     | 0.9  | 0.904 | 0.949 |
| CYP2D6 | CYP3A4  | 9606.ENSP00000353820 | 9606.ENSP00000337915 | 0 | 0 | 0.421 | 0.617 | 0.089 | 0     | 0.9  | 0.935 | 0.948 |
| CYP2D6 | MAOA    | 9606.ENSP00000353820 | 9606.ENSP00000340684 | 0 | 0 | 0     | 0     | 0.063 | 0     | 0.9  | 0.522 | 0.951 |
| CYP2D6 | HSD11B1 | 9606.ENSP00000353820 | 9606.ENSP00000355995 | 0 | 0 | 0     | 0     | 0.062 | 0.193 | 0.9  | 0.163 | 0.928 |
| CYP2D6 | MAOB    | 9606.ENSP00000353820 | 9606.ENSP00000367309 | 0 | 0 | 0     | 0     | 0.063 | 0     | 0.9  | 0.479 | 0.946 |
| CYP3A4 | SULT1E1 | 9606.ENSP00000337915 | 9606.ENSP00000226444 | 0 | 0 | 0     | 0     | 0.086 | 0     | 0.9  | 0.429 | 0.943 |
| CYP3A4 | NR1I2   | 9606.ENSP00000337915 | 9606.ENSP00000336528 | 0 | 0 | 0     | 0     | 0.134 | 0.085 | 0    | 0.955 | 0.962 |
| CYP3A4 | MAOB    | 9606.ENSP00000337915 | 9606.ENSP00000367309 | 0 | 0 | 0     | 0     | 0.063 | 0     | 0.9  | 0.267 | 0.925 |
| CYP3A4 | HSD11B1 | 9606.ENSP00000337915 | 9606.ENSP00000355995 | 0 | 0 | 0     | 0     | 0.113 | 0.059 | 0.9  | 0.255 | 0.929 |
| CYP3A4 | MAOA    | 9606.ENSP00000337915 | 9606.ENSP00000340684 | 0 | 0 | 0     | 0     | 0.063 | 0     | 0.9  | 0.34  | 0.932 |
| DGAT1  | OLR1    | 9606.ENSP00000482264 | 9606.ENSP00000309124 | 0 | 0 | 0     | 0     | 0     | 0     | 0.9  | 0.156 | 0.912 |
| DRD2   | DRD4    | 9606.ENSP00000354859 | 9606.ENSP00000176183 | 0 | 0 | 0     | 0.855 | 0     | 0.379 | 0.9  | 0.885 | 0.943 |
| DRD2   | SLC6A3  | 9606.ENSP00000354859 | 9606.ENSP00000270349 | 0 | 0 | 0     | 0     | 0.062 | 0.454 | 0.8  | 0.917 | 0.99  |
| DRD2   | HTR1B   | 9606.ENSP00000354859 | 9606.ENSP00000358963 | 0 | 0 | 0     | 0.79  | 0.062 | 0     | 0.9  | 0.657 | 0.915 |
| DRD2   | OPRM1   | 9606.ENSP00000354859 | 9606.ENSP00000394624 | 0 | 0 | 0     | 0.583 | 0     | 0     | 0.9  | 0.789 | 0.932 |

|      |          |                      |                      |   |   |   |       |       |       |     |       |       |
|------|----------|----------------------|----------------------|---|---|---|-------|-------|-------|-----|-------|-------|
| DRD4 | HTR1B    | 9606.ENSP00000176183 | 9606.ENSP00000358963 | 0 | 0 | 0 | 0.746 | 0     | 0     | 0.9 | 0.673 | 0.916 |
| DRD4 | OPRM1    | 9606.ENSP00000176183 | 9606.ENSP00000394624 | 0 | 0 | 0 | 0.587 | 0     | 0     | 0.9 | 0.735 | 0.929 |
| E2F1 | SORT1    | 9606.ENSP00000345571 | 9606.ENSP00000256637 | 0 | 0 | 0 | 0     | 0     | 0     | 0.9 | 0     | 0.900 |
| EGF  | SERPINE1 | 9606.ENSP00000265171 | 9606.ENSP00000223095 | 0 | 0 | 0 | 0     | 0     | 0     | 0.9 | 0.798 | 0.978 |
| EGF  | PIK3CA   | 9606.ENSP00000265171 | 9606.ENSP00000263967 | 0 | 0 | 0 | 0     | 0     | 0     | 0.9 | 0.583 | 0.956 |
| EGF  | STAT3    | 9606.ENSP00000265171 | 9606.ENSP00000264657 | 0 | 0 | 0 | 0     | 0     | 0     | 0.9 | 0.853 | 0.984 |
| EGF  | PRKCB    | 9606.ENSP00000265171 | 9606.ENSP00000305355 | 0 | 0 | 0 | 0     | 0     | 0     | 0.9 | 0.266 | 0.923 |
| EGF  | HSPA8    | 9606.ENSP00000265171 | 9606.ENSP00000432083 | 0 | 0 | 0 | 0     | 0     | 0     | 0.9 | 0.309 | 0.927 |
| EGF  | PIK3R1   | 9606.ENSP00000265171 | 9606.ENSP00000428056 | 0 | 0 | 0 | 0     | 0     | 0     | 0.9 | 0.389 | 0.936 |
| EGF  | IGF2R    | 9606.ENSP00000265171 | 9606.ENSP00000349437 | 0 | 0 | 0 | 0     | 0     | 0     | 0.9 | 0.421 | 0.939 |
| EGF  | PRKCA    | 9606.ENSP00000265171 | 9606.ENSP00000408695 | 0 | 0 | 0 | 0     | 0     | 0     | 0.9 | 0.473 | 0.945 |
| EGF  | PTPN1    | 9606.ENSP00000265171 | 9606.ENSP00000360683 | 0 | 0 | 0 | 0     | 0     | 0     | 0.9 | 0.532 | 0.951 |
| EGF  | STAT1    | 9606.ENSP00000265171 | 9606.ENSP00000354394 | 0 | 0 | 0 | 0     | 0     | 0     | 0.9 | 0.558 | 0.953 |
| EGF  | HSP90AA1 | 9606.ENSP00000265171 | 9606.ENSP00000335153 | 0 | 0 | 0 | 0     | 0     | 0.064 | 0.9 | 0.557 | 0.954 |
| EGF  | ITGB1    | 9606.ENSP00000265171 | 9606.ENSP00000379350 | 0 | 0 | 0 | 0     | 0     | 0.085 | 0.9 | 0.569 | 0.957 |
| EGF  | PLG      | 9606.ENSP00000265171 | 9606.ENSP00000308938 | 0 | 0 | 0 | 0     | 0     | 0     | 0.9 | 0.661 | 0.964 |
| EGF  | IGF2     | 9606.ENSP00000265171 | 9606.ENSP00000391826 | 0 | 0 | 0 | 0     | 0     | 0     | 0.9 | 0.672 | 0.965 |
| EGF  | MTOR     | 9606.ENSP00000265171 | 9606.ENSP00000354558 | 0 | 0 | 0 | 0     | 0     | 0     | 0.9 | 0.668 | 0.965 |
| EGF  | VEGFA    | 9606.ENSP00000265171 | 9606.ENSP00000478570 | 0 | 0 | 0 | 0     | 0     | 0     | 0.9 | 0.937 | 0.993 |
| EGF  | EGFR     | 9606.ENSP00000265171 | 9606.ENSP00000275493 | 0 | 0 | 0 | 0     | 0.16  | 0.933 | 0.9 | 0.972 | 0.999 |
| EGFR | MAPK1    | 9606.ENSP00000275493 | 9606.ENSP00000215832 | 0 | 0 | 0 | 0.577 | 0     | 0.472 | 0.9 | 0.887 | 0.965 |
| EGFR | PIK3CA   | 9606.ENSP00000275493 | 9606.ENSP00000263967 | 0 | 0 | 0 | 0     | 0     | 0.37  | 0.9 | 0.866 | 0.99  |
| EGFR | STAT3    | 9606.ENSP00000275493 | 9606.ENSP00000264657 | 0 | 0 | 0 | 0     | 0     | 0.753 | 0.9 | 0.927 | 0.998 |
| EGFR | FOS      | 9606.ENSP00000275493 | 9606.ENSP00000306245 | 0 | 0 | 0 | 0     | 0     | 0.533 | 0   | 0.794 | 0.900 |
| EGFR | IL6      | 9606.ENSP00000275493 | 9606.ENSP00000385675 | 0 | 0 | 0 | 0     | 0     | 0     | 0.6 | 0.811 | 0.921 |
| EGFR | IGF2R    | 9606.ENSP00000275493 | 9606.ENSP00000349437 | 0 | 0 | 0 | 0     | 0.062 | 0     | 0.9 | 0.441 | 0.942 |

|      |          |                      |                      |   |   |   |       |       |       |     |       |       |
|------|----------|----------------------|----------------------|---|---|---|-------|-------|-------|-----|-------|-------|
| EGFR | ESR1     | 9606.ENSP00000275493 | 9606.ENSP00000405330 | 0 | 0 | 0 | 0     | 0     | 0.402 | 0   | 0.908 | 0.943 |
| EGFR | PRKCB    | 9606.ENSP00000275493 | 9606.ENSP00000305355 | 0 | 0 | 0 | 0.553 | 0.049 | 0.403 | 0.9 | 0.304 | 0.945 |
| EGFR | PRKCA    | 9606.ENSP00000275493 | 9606.ENSP00000408695 | 0 | 0 | 0 | 0.557 | 0.049 | 0.44  | 0.9 | 0.676 | 0.959 |
| EGFR | HSPA8    | 9606.ENSP00000275493 | 9606.ENSP00000432083 | 0 | 0 | 0 | 0     | 0     | 0.393 | 0.9 | 0.386 | 0.959 |
| EGFR | ITGB1    | 9606.ENSP00000275493 | 9606.ENSP00000379350 | 0 | 0 | 0 | 0     | 0.097 | 0.416 | 0.9 | 0.454 | 0.967 |
| EGFR | HIF1A    | 9606.ENSP00000275493 | 9606.ENSP00000437955 | 0 | 0 | 0 | 0     | 0     | 0     | 0.9 | 0.743 | 0.973 |
| EGFR | VEGFA    | 9606.ENSP00000275493 | 9606.ENSP00000478570 | 0 | 0 | 0 | 0     | 0.089 | 0     | 0.6 | 0.947 | 0.979 |
| EGFR | STAT1    | 9606.ENSP00000275493 | 9606.ENSP00000354394 | 0 | 0 | 0 | 0     | 0.061 | 0.42  | 0.9 | 0.764 | 0.985 |
| EGFR | MTOR     | 9606.ENSP00000275493 | 9606.ENSP00000354558 | 0 | 0 | 0 | 0     | 0.061 | 0.204 | 0.9 | 0.843 | 0.986 |
| EGFR | PTPN1    | 9606.ENSP00000275493 | 9606.ENSP00000360683 | 0 | 0 | 0 | 0     | 0     | 0.47  | 0.9 | 0.798 | 0.988 |
| EGFR | HSP90AA1 | 9606.ENSP00000275493 | 9606.ENSP00000335153 | 0 | 0 | 0 | 0     | 0     | 0.487 | 0.9 | 0.817 | 0.989 |
| EGFR | PIK3R1   | 9606.ENSP00000275493 | 9606.ENSP00000428056 | 0 | 0 | 0 | 0     | 0     | 0.882 | 0.9 | 0.581 | 0.994 |
| ERN1 | HSPA5    | 9606.ENSP00000401445 | 9606.ENSP00000324173 | 0 | 0 | 0 | 0     | 0     | 0.521 | 0.9 | 0.948 | 0.997 |
| ESR1 | MAPK1    | 9606.ENSP00000405330 | 9606.ENSP00000215832 | 0 | 0 | 0 | 0     | 0     | 0.399 | 0.9 | 0.57  | 0.971 |
| ESR1 | NR3C1    | 9606.ENSP00000405330 | 9606.ENSP00000231509 | 0 | 0 | 0 | 0.66  | 0     | 0     | 0.9 | 0.751 | 0.925 |
| ESR1 | HSPB1    | 9606.ENSP00000405330 | 9606.ENSP00000248553 | 0 | 0 | 0 | 0     | 0     | 0.336 | 0.9 | 0.414 | 0.957 |
| ESR1 | PIK3CA   | 9606.ENSP00000405330 | 9606.ENSP00000263967 | 0 | 0 | 0 | 0     | 0     | 0.379 | 0.9 | 0.669 | 0.977 |
| ESR1 | IGF1R    | 9606.ENSP00000405330 | 9606.ENSP00000268035 | 0 | 0 | 0 | 0     | 0     | 0.407 | 0.9 | 0.835 | 0.989 |
| ESR1 | NOS3     | 9606.ENSP00000405330 | 9606.ENSP00000297494 | 0 | 0 | 0 | 0     | 0     | 0.472 | 0.9 | 0.749 | 0.985 |
| ESR1 | FOS      | 9606.ENSP00000405330 | 9606.ENSP00000306245 | 0 | 0 | 0 | 0     | 0     | 0.475 | 0.9 | 0.688 | 0.982 |
| ESR1 | TERT     | 9606.ENSP00000405330 | 9606.ENSP00000309572 | 0 | 0 | 0 | 0     | 0     | 0.043 | 0.9 | 0.695 | 0.968 |
| ESR1 | HSP90AA1 | 9606.ENSP00000405330 | 9606.ENSP00000335153 | 0 | 0 | 0 | 0     | 0     | 0.474 | 0.9 | 0.633 | 0.979 |
| ESR1 | STAT1    | 9606.ENSP00000405330 | 9606.ENSP00000354394 | 0 | 0 | 0 | 0     | 0     | 0.448 | 0.9 | 0.458 | 0.967 |
| ESR1 | JUN      | 9606.ENSP00000405330 | 9606.ENSP00000360266 | 0 | 0 | 0 | 0     | 0     | 0.472 | 0.9 | 0.646 | 0.979 |
| ESR1 | MAPK8    | 9606.ENSP00000405330 | 9606.ENSP00000378974 | 0 | 0 | 0 | 0     | 0     | 0     | 0.8 | 0.559 | 0.908 |
| ESR1 | ESRRA    | 9606.ENSP00000405330 | 9606.ENSP00000384851 | 0 | 0 | 0 | 0.849 | 0     | 0.379 | 0.9 | 0.668 | 0.941 |

|       |        |                      |                      |   |   |   |       |       |       |     |       |       |
|-------|--------|----------------------|----------------------|---|---|---|-------|-------|-------|-----|-------|-------|
| ESR1  | PIK3R1 | 9606.ENSP00000405330 | 9606.ENSP00000428056 | 0 | 0 | 0 | 0     | 0.063 | 0.404 | 0.9 | 0.418 | 0.963 |
| ESR1  | MYC    | 9606.ENSP00000405330 | 9606.ENSP00000479618 | 0 | 0 | 0 | 0     | 0     | 0.442 | 0.9 | 0.721 | 0.983 |
| ESRRA | NR3C1  | 9606.ENSP00000384851 | 9606.ENSP00000231509 | 0 | 0 | 0 | 0.746 | 0     | 0     | 0.9 | 0.348 | 0.908 |
| ESRRA | STAT1  | 9606.ENSP00000384851 | 9606.ENSP00000354394 | 0 | 0 | 0 | 0     | 0     | 0.053 | 0.9 | 0.109 | 0.908 |
| ESRRA | PPARA  | 9606.ENSP00000384851 | 9606.ENSP00000385523 | 0 | 0 | 0 | 0.616 | 0.05  | 0     | 0.9 | 0.719 | 0.927 |
| F2    | MAPK1  | 9606.ENSP00000308541 | 9606.ENSP00000215832 | 0 | 0 | 0 | 0     | 0     | 0.053 | 0.9 | 0.331 | 0.931 |
| F2    | PIK3CA | 9606.ENSP00000308541 | 9606.ENSP00000263967 | 0 | 0 | 0 | 0     | 0     | 0     | 0.9 | 0.074 | 0.903 |
| F2    | F2RL1  | 9606.ENSP00000308541 | 9606.ENSP00000296677 | 0 | 0 | 0 | 0     | 0.061 | 0.348 | 0.9 | 0.413 | 0.959 |
| F2    | PIK3R1 | 9606.ENSP00000308541 | 9606.ENSP00000428056 | 0 | 0 | 0 | 0     | 0     | 0     | 0.9 | 0.085 | 0.904 |
| F2    | PPARA  | 9606.ENSP00000308541 | 9606.ENSP00000385523 | 0 | 0 | 0 | 0     | 0.063 | 0     | 0.9 | 0.106 | 0.908 |
| F2    | HTR2A  | 9606.ENSP00000308541 | 9606.ENSP00000437737 | 0 | 0 | 0 | 0     | 0     | 0     | 0.9 | 0.125 | 0.908 |
| F2    | GCGR   | 9606.ENSP00000308541 | 9606.ENSP00000383558 | 0 | 0 | 0 | 0     | 0.12  | 0     | 0.9 | 0.092 | 0.913 |
| F2    | IGF2   | 9606.ENSP00000308541 | 9606.ENSP00000391826 | 0 | 0 | 0 | 0     | 0.169 | 0     | 0.9 | 0.149 | 0.923 |
| F2    | IGFBP3 | 9606.ENSP00000308541 | 9606.ENSP00000370473 | 0 | 0 | 0 | 0     | 0.1   | 0.379 | 0.9 | 0.124 | 0.944 |
| F2    | F3     | 9606.ENSP00000308541 | 9606.ENSP00000334145 | 0 | 0 | 0 | 0     | 0     | 0     | 0.9 | 0.933 | 0.993 |
| F2RL1 | PIK3CA | 9606.ENSP00000296677 | 9606.ENSP00000263967 | 0 | 0 | 0 | 0     | 0     | 0     | 0.9 | 0.044 | 0.900 |
| F2RL1 | HTR2A  | 9606.ENSP00000296677 | 9606.ENSP00000437737 | 0 | 0 | 0 | 0     | 0     | 0     | 0.9 | 0.05  | 0.900 |
| F2RL1 | GCGR   | 9606.ENSP00000296677 | 9606.ENSP00000383558 | 0 | 0 | 0 | 0     | 0     | 0     | 0.9 | 0.062 | 0.902 |
| F2RL1 | PIK3R1 | 9606.ENSP00000296677 | 9606.ENSP00000428056 | 0 | 0 | 0 | 0     | 0     | 0     | 0.9 | 0.151 | 0.911 |
| F3    | PLG    | 9606.ENSP00000334145 | 9606.ENSP00000308938 | 0 | 0 | 0 | 0     | 0     | 0.379 | 0   | 0.866 | 0.913 |
| FABP1 | FABP4  | 9606.ENSP00000295834 | 9606.ENSP00000256104 | 0 | 0 | 0 | 0     | 0.062 | 0     | 0.9 | 0.698 | 0.969 |
| FABP1 | RELA   | 9606.ENSP00000295834 | 9606.ENSP00000384273 | 0 | 0 | 0 | 0     | 0     | 0     | 0.9 | 0.047 | 0.900 |
| FABP1 | JUN    | 9606.ENSP00000295834 | 9606.ENSP00000360266 | 0 | 0 | 0 | 0     | 0     | 0     | 0.9 | 0.121 | 0.908 |
| FABP1 | FDFT1  | 9606.ENSP00000295834 | 9606.ENSP00000480828 | 0 | 0 | 0 | 0     | 0     | 0     | 0.9 | 0.145 | 0.910 |
| FABP1 | RXRA   | 9606.ENSP00000295834 | 9606.ENSP00000419692 | 0 | 0 | 0 | 0     | 0.061 | 0.064 | 0.9 | 0.265 | 0.926 |
| FABP1 | PPARA  | 9606.ENSP00000295834 | 9606.ENSP00000385523 | 0 | 0 | 0 | 0     | 0.064 | 0.472 | 0.9 | 0.788 | 0.988 |

|       |        |                      |                      |       |   |   |   |       |       |     |       |       |
|-------|--------|----------------------|----------------------|-------|---|---|---|-------|-------|-----|-------|-------|
| FABP4 | RXRA   | 9606.ENSP00000256104 | 9606.ENSP00000419692 | 0     | 0 | 0 | 0 | 0.061 | 0.064 | 0.9 | 0.455 | 0.945 |
| FABP4 | PPARG  | 9606.ENSP00000256104 | 9606.ENSP00000287820 | 0     | 0 | 0 | 0 | 0.087 | 0.064 | 0.9 | 0.915 | 0.991 |
| FDFT1 | SQLE   | 9606.ENSP00000480828 | 9606.ENSP00000265896 | 0.135 | 0 | 0 | 0 | 0.569 | 0     | 0.9 | 0.945 | 0.997 |
| FDFT1 | PPARA  | 9606.ENSP00000480828 | 9606.ENSP00000385523 | 0     | 0 | 0 | 0 | 0     | 0     | 0.9 | 0.267 | 0.923 |
| FDFT1 | RXRA   | 9606.ENSP00000480828 | 9606.ENSP00000419692 | 0     | 0 | 0 | 0 | 0     | 0     | 0.9 | 0.107 | 0.906 |
| FGF1  | MAPK1  | 9606.ENSP00000480791 | 9606.ENSP00000215832 | 0     | 0 | 0 | 0 | 0     | 0     | 0.9 | 0.397 | 0.937 |
| FGF1  | PIK3CA | 9606.ENSP00000480791 | 9606.ENSP00000263967 | 0     | 0 | 0 | 0 | 0     | 0     | 0.9 | 0.129 | 0.909 |
| FGF1  | PIK3R1 | 9606.ENSP00000480791 | 9606.ENSP00000428056 | 0     | 0 | 0 | 0 | 0.062 | 0     | 0.9 | 0.228 | 0.921 |
| FLT1  | PIK3CA | 9606.ENSP00000282397 | 9606.ENSP00000263967 | 0     | 0 | 0 | 0 | 0     | 0.263 | 0.9 | 0.427 | 0.954 |
| FLT1  | PIK3R1 | 9606.ENSP00000282397 | 9606.ENSP00000428056 | 0     | 0 | 0 | 0 | 0     | 0.719 | 0.9 | 0.187 | 0.975 |
| FLT1  | VEGFA  | 9606.ENSP00000282397 | 9606.ENSP00000478570 | 0     | 0 | 0 | 0 | 0.061 | 0.556 | 0.9 | 0.984 | 0.999 |
| FOS   | MAPK1  | 9606.ENSP00000306245 | 9606.ENSP00000215832 | 0     | 0 | 0 | 0 | 0     | 0.523 | 0.9 | 0.852 | 0.992 |
| FOS   | HMOX1  | 9606.ENSP00000306245 | 9606.ENSP00000216117 | 0     | 0 | 0 | 0 | 0     | 0     | 0.9 | 0.482 | 0.946 |
| FOS   | NR3C1  | 9606.ENSP00000306245 | 9606.ENSP00000231509 | 0     | 0 | 0 | 0 | 0.055 | 0.299 | 0.9 | 0.634 | 0.972 |
| FOS   | IL1A   | 9606.ENSP00000306245 | 9606.ENSP00000263339 | 0     | 0 | 0 | 0 | 0.062 | 0     | 0.9 | 0.425 | 0.941 |
| FOS   | STAT3  | 9606.ENSP00000306245 | 9606.ENSP00000264657 | 0     | 0 | 0 | 0 | 0     | 0.423 | 0.9 | 0.811 | 0.988 |
| FOS   | PPARG  | 9606.ENSP00000306245 | 9606.ENSP00000287820 | 0     | 0 | 0 | 0 | 0     | 0.098 | 0.9 | 0.683 | 0.968 |
| FOS   | MYC    | 9606.ENSP00000306245 | 9606.ENSP00000479618 | 0     | 0 | 0 | 0 | 0.064 | 0.442 | 0   | 0.851 | 0.915 |
| FOS   | NFE2L2 | 9606.ENSP00000306245 | 9606.ENSP00000380252 | 0     | 0 | 0 | 0 | 0     | 0.051 | 0.9 | 0.426 | 0.94  |
| FOS   | RELA   | 9606.ENSP00000306245 | 9606.ENSP00000384273 | 0     | 0 | 0 | 0 | 0     | 0.379 | 0.9 | 0.539 | 0.968 |
| FOS   | TNF    | 9606.ENSP00000306245 | 9606.ENSP00000398698 | 0     | 0 | 0 | 0 | 0     | 0     | 0.9 | 0.819 | 0.981 |
| FOS   | IL6    | 9606.ENSP00000306245 | 9606.ENSP00000385675 | 0     | 0 | 0 | 0 | 0.088 | 0     | 0.9 | 0.819 | 0.982 |
| FOS   | MAPK8  | 9606.ENSP00000306245 | 9606.ENSP00000378974 | 0     | 0 | 0 | 0 | 0     | 0.26  | 0.9 | 0.885 | 0.99  |
| FOS   | JUN    | 9606.ENSP00000306245 | 9606.ENSP00000360266 | 0     | 0 | 0 | 0 | 0.656 | 0.879 | 0.9 | 0.975 | 0.999 |
| GCGR  | PIK3CA | 9606.ENSP00000383558 | 9606.ENSP00000263967 | 0     | 0 | 0 | 0 | 0     | 0     | 0.9 | 0.042 | 0.900 |
| GCGR  | HTR7   | 9606.ENSP00000383558 | 9606.ENSP00000337949 | 0     | 0 | 0 | 0 | 0     | 0     | 0.9 | 0.101 | 0.906 |

|         |          |                      |                      |   |   |       |       |       |       |      |       |       |
|---------|----------|----------------------|----------------------|---|---|-------|-------|-------|-------|------|-------|-------|
| GCGR    | HTR2A    | 9606.ENSP00000383558 | 9606.ENSP00000437737 | 0 | 0 | 0     | 0     | 0     | 0     | 0.9  | 0.05  | 0.900 |
| GCGR    | PIK3R1   | 9606.ENSP00000383558 | 9606.ENSP00000428056 | 0 | 0 | 0     | 0     | 0     | 0     | 0.9  | 0     | 0.900 |
| GLB1    | MAPK1    | 9606.ENSP00000306920 | 9606.ENSP00000215832 | 0 | 0 | 0     | 0     | 0     | 0     | 0.9  | 0.086 | 0.904 |
| GLB1    | MPO      | 9606.ENSP00000306920 | 9606.ENSP00000225275 | 0 | 0 | 0     | 0     | 0     | 0     | 0.9  | 0.057 | 0.901 |
| GLB1    | TTR      | 9606.ENSP00000306920 | 9606.ENSP00000237014 | 0 | 0 | 0     | 0     | 0     | 0     | 0.9  | 0.058 | 0.901 |
| GLB1    | PRKCD    | 9606.ENSP00000306920 | 9606.ENSP00000378217 | 0 | 0 | 0     | 0     | 0     | 0     | 0.9  | 0.05  | 0.900 |
| GSK3B   | NR3C1    | 9606.ENSP00000324806 | 9606.ENSP00000231509 | 0 | 0 | 0     | 0     | 0     | 0.085 | 0.9  | 0.432 | 0.943 |
| GSK3B   | PIN1     | 9606.ENSP00000324806 | 9606.ENSP00000247970 | 0 | 0 | 0     | 0     | 0.061 | 0.085 | 0.9  | 0.115 | 0.913 |
| GSK3B   | TP63     | 9606.ENSP00000324806 | 9606.ENSP00000264731 | 0 | 0 | 0     | 0     | 0     | 0     | 0.9  | 0.101 | 0.906 |
| GSK3B   | STAT1    | 9606.ENSP00000324806 | 9606.ENSP00000354394 | 0 | 0 | 0     | 0     | 0.062 | 0.124 | 0.9  | 0.209 | 0.926 |
| GSK3B   | JUN      | 9606.ENSP00000324806 | 9606.ENSP00000360266 | 0 | 0 | 0     | 0     | 0     | 0.541 | 0.9  | 0.574 | 0.978 |
| GSK3B   | MYC      | 9606.ENSP00000324806 | 9606.ENSP00000479618 | 0 | 0 | 0     | 0     | 0.063 | 0.391 | 0.9  | 0.732 | 0.982 |
| GSK3B   | MAPT     | 9606.ENSP00000324806 | 9606.ENSP00000340820 | 0 | 0 | 0     | 0     | 0.061 | 0.379 | 0.9  | 0.804 | 0.987 |
| GSTM1   | GSTM2    | 9606.ENSP00000311469 | 9606.ENSP00000241337 | 0 | 0 | 0.447 | 0.981 | 0.83  | 0.379 | 0.65 | 0.831 | 0.960 |
| HIF1A   | MAPK1    | 9606.ENSP00000437955 | 9606.ENSP00000215832 | 0 | 0 | 0     | 0     | 0     | 0.294 | 0.8  | 0.455 | 0.916 |
| HIF1A   | NR3C1    | 9606.ENSP00000437955 | 9606.ENSP00000231509 | 0 | 0 | 0     | 0     | 0     | 0.095 | 0.9  | 0.326 | 0.933 |
| HIF1A   | STAT3    | 9606.ENSP00000437955 | 9606.ENSP00000264657 | 0 | 0 | 0     | 0     | 0.061 | 0.434 | 0.9  | 0.781 | 0.986 |
| HIF1A   | NOS3     | 9606.ENSP00000437955 | 9606.ENSP00000297494 | 0 | 0 | 0     | 0     | 0     | 0     | 0.9  | 0.706 | 0.969 |
| HIF1A   | HSP90AA1 | 9606.ENSP00000437955 | 9606.ENSP00000335153 | 0 | 0 | 0     | 0     | 0     | 0.472 | 0.9  | 0.597 | 0.976 |
| HIF1A   | JUN      | 9606.ENSP00000437955 | 9606.ENSP00000360266 | 0 | 0 | 0     | 0     | 0     | 0.379 | 0.9  | 0.561 | 0.970 |
| HIF1A   | VEGFA    | 9606.ENSP00000437955 | 9606.ENSP00000478570 | 0 | 0 | 0     | 0     | 0.062 | 0.348 | 0.9  | 0.947 | 0.996 |
| HMOX1   | NQO1     | 9606.ENSP00000216117 | 9606.ENSP00000319788 | 0 | 0 | 0     | 0     | 0.056 | 0     | 0    | 0.951 | 0.952 |
| HMOX1   | JUN      | 9606.ENSP00000216117 | 9606.ENSP00000360266 | 0 | 0 | 0     | 0     | 0     | 0     | 0.9  | 0.784 | 0.977 |
| HMOX1   | NFE2L2   | 9606.ENSP00000216117 | 9606.ENSP00000380252 | 0 | 0 | 0     | 0     | 0     | 0     | 0.9  | 0.968 | 0.996 |
| HPSE    | SLPI     | 9606.ENSP00000384262 | 9606.ENSP00000342082 | 0 | 0 | 0     | 0     | 0.061 | 0     | 0.9  | 0     | 0.902 |
| HSD11B1 | PPARG    | 9606.ENSP00000355995 | 9606.ENSP00000287820 | 0 | 0 | 0     | 0     | 0.061 | 0     | 0.9  | 0.462 | 0.945 |

|          |        |                      |                      |   |   |       |       |       |       |     |       |       |
|----------|--------|----------------------|----------------------|---|---|-------|-------|-------|-------|-----|-------|-------|
| HSD11B1  | RXRA   | 9606.ENSP00000355995 | 9606.ENSP00000419692 | 0 | 0 | 0     | 0     | 0     | 0     | 0.9 | 0.094 | 0.905 |
| HSP90AA1 | MAPK1  | 9606.ENSP00000335153 | 9606.ENSP00000215832 | 0 | 0 | 0     | 0     | 0.06  | 0.524 | 0.9 | 0.605 | 0.979 |
| HSP90AA1 | MMP2   | 9606.ENSP00000335153 | 9606.ENSP00000219070 | 0 | 0 | 0     | 0     | 0     | 0.379 | 0   | 0.878 | 0.921 |
| HSP90AA1 | IL2    | 9606.ENSP00000335153 | 9606.ENSP00000226730 | 0 | 0 | 0     | 0     | 0     | 0     | 0.9 | 0.416 | 0.939 |
| HSP90AA1 | IFNG   | 9606.ENSP00000335153 | 9606.ENSP00000229135 | 0 | 0 | 0     | 0     | 0     | 0     | 0.9 | 0.255 | 0.922 |
| HSP90AA1 | NR3C1  | 9606.ENSP00000335153 | 9606.ENSP00000231509 | 0 | 0 | 0     | 0     | 0     | 0.474 | 0.9 | 0.71  | 0.983 |
| HSP90AA1 | PIK3CA | 9606.ENSP00000335153 | 9606.ENSP00000263967 | 0 | 0 | 0     | 0     | 0     | 0.063 | 0.9 | 0.38  | 0.936 |
| HSP90AA1 | STAT3  | 9606.ENSP00000335153 | 9606.ENSP00000264657 | 0 | 0 | 0     | 0     | 0     | 0.379 | 0.9 | 0.745 | 0.982 |
| HSP90AA1 | NOS3   | 9606.ENSP00000335153 | 9606.ENSP00000297494 | 0 | 0 | 0     | 0     | 0.06  | 0.379 | 0.9 | 0.873 | 0.991 |
| HSP90AA1 | TERT   | 9606.ENSP00000335153 | 9606.ENSP00000309572 | 0 | 0 | 0     | 0     | 0     | 0.446 | 0.9 | 0.704 | 0.982 |
| HSP90AA1 | HSPA5  | 9606.ENSP00000335153 | 9606.ENSP00000324173 | 0 | 0 | 0     | 0     | 0.637 | 0.412 | 0   | 0.85  | 0.965 |
| HSP90AA1 | PIK3R1 | 9606.ENSP00000335153 | 9606.ENSP00000428056 | 0 | 0 | 0     | 0     | 0.061 | 0     | 0.9 | 0.232 | 0.921 |
| HSP90AA1 | PRKCA  | 9606.ENSP00000335153 | 9606.ENSP00000408695 | 0 | 0 | 0     | 0     | 0     | 0.32  | 0.9 | 0.211 | 0.941 |
| HSP90AA1 | PPARA  | 9606.ENSP00000335153 | 9606.ENSP00000385523 | 0 | 0 | 0     | 0     | 0     | 0.474 | 0.9 | 0.239 | 0.956 |
| HSP90AA1 | MTOR   | 9606.ENSP00000335153 | 9606.ENSP00000354558 | 0 | 0 | 0     | 0     | 0     | 0.063 | 0.9 | 0.615 | 0.96  |
| HSP90AA1 | NR3C2  | 9606.ENSP00000335153 | 9606.ENSP00000350815 | 0 | 0 | 0     | 0     | 0     | 0.474 | 0.9 | 0.425 | 0.967 |
| HSP90AA1 | VEGFA  | 9606.ENSP00000335153 | 9606.ENSP00000478570 | 0 | 0 | 0     | 0     | 0     | 0.379 | 0.9 | 0.62  | 0.974 |
| HSP90AA1 | HSPA1A | 9606.ENSP00000335153 | 9606.ENSP00000364802 | 0 | 0 | 0     | 0     | 0.317 | 0.713 | 0.9 | 0.876 | 0.997 |
| HSP90AA1 | HSPA8  | 9606.ENSP00000335153 | 9606.ENSP00000432083 | 0 | 0 | 0     | 0     | 0.771 | 0.73  | 0.9 | 0.929 | 0.999 |
| HSPA1A   | MAPK1  | 9606.ENSP00000364802 | 9606.ENSP00000215832 | 0 | 0 | 0     | 0     | 0     | 0.157 | 0.9 | 0.303 | 0.936 |
| HSPA1A   | IFNG   | 9606.ENSP00000364802 | 9606.ENSP00000229135 | 0 | 0 | 0     | 0     | 0     | 0     | 0.9 | 0.286 | 0.925 |
| HSPA1A   | NR3C1  | 9606.ENSP00000364802 | 9606.ENSP00000231509 | 0 | 0 | 0     | 0     | 0     | 0.423 | 0.9 | 0.425 | 0.963 |
| HSPA1A   | HSPB1  | 9606.ENSP00000364802 | 9606.ENSP00000248553 | 0 | 0 | 0     | 0     | 0.092 | 0.127 | 0.9 | 0.771 | 0.979 |
| HSPA1A   | PABPC1 | 9606.ENSP00000364802 | 9606.ENSP00000313007 | 0 | 0 | 0     | 0     | 0.112 | 0.13  | 0.9 | 0.165 | 0.926 |
| HSPA1A   | HSPA5  | 9606.ENSP00000364802 | 9606.ENSP00000324173 | 0 | 0 | 0.448 | 0.965 | 0.226 | 0.805 | 0.9 | 0.761 | 0.984 |
| HSPA1A   | NR3C2  | 9606.ENSP00000364802 | 9606.ENSP00000350815 | 0 | 0 | 0     | 0     | 0     | 0.109 | 0.9 | 0.253 | 0.927 |



|        |        |                      |                      |   |   |       |       |       |       |     |       |       |
|--------|--------|----------------------|----------------------|---|---|-------|-------|-------|-------|-----|-------|-------|
| HSPA1A | PPARA  | 9606.ENSP00000364802 | 9606.ENSP00000385523 | 0 | 0 | 0     | 0     | 0     | 0.109 | 0.9 | 0.092 | 0.912 |
| HSPA1A | HSPA8  | 9606.ENSP00000364802 | 9606.ENSP00000432083 | 0 | 0 | 0.449 | 0.983 | 0.061 | 0.387 | 0.9 | 0.812 | 0.938 |
| HSPA5  | HSPA8  | 9606.ENSP00000324173 | 9606.ENSP00000432083 | 0 | 0 | 0.448 | 0.966 | 0.241 | 0.378 | 0.9 | 0.798 | 0.950 |
| HSPA8  | NR3C1  | 9606.ENSP00000432083 | 9606.ENSP00000231509 | 0 | 0 | 0     | 0     | 0     | 0.166 | 0.9 | 0.386 | 0.944 |
| HSPA8  | HSPB1  | 9606.ENSP00000432083 | 9606.ENSP00000248553 | 0 | 0 | 0     | 0     | 0.065 | 0.42  | 0.9 | 0.742 | 0.984 |
| HSPA8  | SORT1  | 9606.ENSP00000432083 | 9606.ENSP00000256637 | 0 | 0 | 0     | 0     | 0.053 | 0     | 0.9 | 0.104 | 0.907 |
| HSPA8  | SF3B3  | 9606.ENSP00000432083 | 9606.ENSP00000305790 | 0 | 0 | 0     | 0     | 0.105 | 0.104 | 0.9 | 0.07  | 0.915 |
| HSPA8  | PABPC1 | 9606.ENSP00000432083 | 9606.ENSP00000313007 | 0 | 0 | 0     | 0     | 0.35  | 0.422 | 0.9 | 0.566 | 0.981 |
| HSPA8  | IGF2R  | 9606.ENSP00000432083 | 9606.ENSP00000349437 | 0 | 0 | 0     | 0     | 0     | 0     | 0.9 | 0.212 | 0.917 |
| HSPA8  | NR3C2  | 9606.ENSP00000432083 | 9606.ENSP00000350815 | 0 | 0 | 0     | 0     | 0     | 0.109 | 0.9 | 0.163 | 0.919 |
| HSPB1  | PABPC1 | 9606.ENSP00000248553 | 9606.ENSP00000313007 | 0 | 0 | 0     | 0     | 0     | 0     | 0.9 | 0.238 | 0.92  |
| HTR1B  | OPRM1  | 9606.ENSP00000358963 | 9606.ENSP00000394624 | 0 | 0 | 0     | 0.65  | 0.061 | 0     | 0.9 | 0.533 | 0.919 |
| HTR2A  | SLC6A4 | 9606.ENSP00000437737 | 9606.ENSP00000261707 | 0 | 0 | 0     | 0     | 0     | 0.073 | 0   | 0.904 | 0.907 |
| HTR2A  | PIK3CA | 9606.ENSP00000437737 | 9606.ENSP00000263967 | 0 | 0 | 0     | 0     | 0     | 0.05  | 0.9 | 0     | 0.900 |
| HTR2A  | PIK3R1 | 9606.ENSP00000437737 | 9606.ENSP00000428056 | 0 | 0 | 0     | 0     | 0.065 | 0.057 | 0.9 | 0     | 0.904 |
| HTR7   | SLC6A4 | 9606.ENSP00000337949 | 9606.ENSP00000261707 | 0 | 0 | 0     | 0     | 0.049 | 0.073 | 0   | 0.91  | 0.913 |
| ICAM1  | IL1B   | 9606.ENSP00000264832 | 9606.ENSP00000263341 | 0 | 0 | 0     | 0     | 0.154 | 0     | 0   | 0.916 | 0.926 |
| ICAM1  | STAT3  | 9606.ENSP00000264832 | 9606.ENSP00000264657 | 0 | 0 | 0     | 0     | 0.084 | 0     | 0.9 | 0.749 | 0.975 |
| ICAM1  | VCAM1  | 9606.ENSP00000264832 | 9606.ENSP00000294728 | 0 | 0 | 0     | 0     | 0.069 | 0     | 0   | 0.938 | 0.940 |
| ICAM1  | IL6    | 9606.ENSP00000264832 | 9606.ENSP00000385675 | 0 | 0 | 0     | 0     | 0.152 | 0     | 0   | 0.947 | 0.953 |
| ICAM1  | TNF    | 9606.ENSP00000264832 | 9606.ENSP00000398698 | 0 | 0 | 0     | 0     | 0.119 | 0     | 0   | 0.957 | 0.960 |
| ICAM1  | IL10   | 9606.ENSP00000264832 | 9606.ENSP00000412237 | 0 | 0 | 0     | 0     | 0     | 0     | 0.9 | 0.858 | 0.985 |
| IFNG   | IL2    | 9606.ENSP00000229135 | 9606.ENSP00000226730 | 0 | 0 | 0     | 0     | 0.087 | 0     | 0   | 0.935 | 0.938 |
| IFNG   | IL1B   | 9606.ENSP00000229135 | 9606.ENSP00000263341 | 0 | 0 | 0     | 0     | 0.082 | 0     | 0   | 0.898 | 0.902 |
| IFNG   | PTPN1  | 9606.ENSP00000229135 | 9606.ENSP00000360683 | 0 | 0 | 0     | 0     | 0     | 0     | 0.9 | 0.112 | 0.907 |
| IFNG   | PRKCD  | 9606.ENSP00000229135 | 9606.ENSP00000378217 | 0 | 0 | 0     | 0     | 0     | 0     | 0.9 | 0.187 | 0.915 |

|       |          |                      |                      |   |   |   |       |       |       |     |       |       |
|-------|----------|----------------------|----------------------|---|---|---|-------|-------|-------|-----|-------|-------|
| IFNG  | PIK3CA   | 9606.ENSP00000229135 | 9606.ENSP00000263967 | 0 | 0 | 0 | 0     | 0     | 0     | 0.9 | 0.185 | 0.915 |
| IFNG  | TERT     | 9606.ENSP00000229135 | 9606.ENSP00000309572 | 0 | 0 | 0 | 0     | 0     | 0     | 0.9 | 0.215 | 0.918 |
| IFNG  | PIK3R1   | 9606.ENSP00000229135 | 9606.ENSP00000428056 | 0 | 0 | 0 | 0     | 0     | 0     | 0.9 | 0.217 | 0.918 |
| IFNG  | IL6      | 9606.ENSP00000229135 | 9606.ENSP00000385675 | 0 | 0 | 0 | 0     | 0.064 | 0     | 0   | 0.937 | 0.939 |
| IFNG  | IL10     | 9606.ENSP00000229135 | 9606.ENSP00000412237 | 0 | 0 | 0 | 0     | 0.064 | 0     | 0   | 0.944 | 0.946 |
| IFNG  | JUN      | 9606.ENSP00000229135 | 9606.ENSP00000360266 | 0 | 0 | 0 | 0     | 0     | 0     | 0.9 | 0.518 | 0.949 |
| IFNG  | RELA     | 9606.ENSP00000229135 | 9606.ENSP00000384273 | 0 | 0 | 0 | 0     | 0     | 0     | 0.9 | 0.614 | 0.959 |
| IFNG  | TNF      | 9606.ENSP00000229135 | 9606.ENSP00000398698 | 0 | 0 | 0 | 0     | 0.152 | 0.379 | 0   | 0.957 | 0.975 |
| IFNG  | STAT1    | 9606.ENSP00000229135 | 9606.ENSP00000354394 | 0 | 0 | 0 | 0     | 0.063 | 0     | 0.9 | 0.898 | 0.989 |
| IGF1R | MAPK1    | 9606.ENSP00000268035 | 9606.ENSP00000215832 | 0 | 0 | 0 | 0.57  | 0     | 0.146 | 0.9 | 0.638 | 0.934 |
| IGF1R | PIK3CA   | 9606.ENSP00000268035 | 9606.ENSP00000263967 | 0 | 0 | 0 | 0     | 0.062 | 0.124 | 0.9 | 0.837 | 0.984 |
| IGF1R | VEGFA    | 9606.ENSP00000268035 | 9606.ENSP00000478570 | 0 | 0 | 0 | 0     | 0     | 0     | 0.6 | 0.796 | 0.915 |
| IGF1R | PRKCD    | 9606.ENSP00000268035 | 9606.ENSP00000378217 | 0 | 0 | 0 | 0.551 | 0.062 | 0.334 | 0.9 | 0.488 | 0.946 |
| IGF1R | PIK3R1   | 9606.ENSP00000268035 | 9606.ENSP00000428056 | 0 | 0 | 0 | 0     | 0.049 | 0.586 | 0.9 | 0.546 | 0.979 |
| IGF1R | INSR     | 9606.ENSP00000268035 | 9606.ENSP00000303830 | 0 | 0 | 0 | 0.957 | 0.062 | 0.974 | 0.8 | 0.869 | 0.994 |
| IGF1R | IGF2     | 9606.ENSP00000268035 | 9606.ENSP00000391826 | 0 | 0 | 0 | 0     | 0     | 0.522 | 0.9 | 0.951 | 0.997 |
| IGF1R | PTPN1    | 9606.ENSP00000268035 | 9606.ENSP00000360683 | 0 | 0 | 0 | 0     | 0.062 | 0.973 | 0.9 | 0.656 | 0.999 |
| IGF2  | MMP2     | 9606.ENSP00000391826 | 9606.ENSP00000219070 | 0 | 0 | 0 | 0     | 0.165 | 0     | 0.9 | 0.399 | 0.945 |
| IGF2  | SERPINE1 | 9606.ENSP00000391826 | 9606.ENSP00000223095 | 0 | 0 | 0 | 0     | 0.088 | 0     | 0.9 | 0.311 | 0.931 |
| IGF2  | INSR     | 9606.ENSP00000391826 | 9606.ENSP00000303830 | 0 | 0 | 0 | 0     | 0     | 0.522 | 0.6 | 0.776 | 0.953 |
| IGF2  | PLG      | 9606.ENSP00000391826 | 9606.ENSP00000308938 | 0 | 0 | 0 | 0     | 0.061 | 0.379 | 0.9 | 0.361 | 0.957 |
| IGF2  | MMP1     | 9606.ENSP00000391826 | 9606.ENSP00000322788 | 0 | 0 | 0 | 0     | 0.076 | 0     | 0.9 | 0.257 | 0.925 |
| IGF2  | IGF2R    | 9606.ENSP00000391826 | 9606.ENSP00000349437 | 0 | 0 | 0 | 0     | 0     | 0.825 | 0   | 0.966 | 0.993 |
| IGF2  | IGFBP3   | 9606.ENSP00000391826 | 9606.ENSP00000370473 | 0 | 0 | 0 | 0     | 0.155 | 0.379 | 0.9 | 0.938 | 0.996 |
| IGF2  | VEGFA    | 9606.ENSP00000391826 | 9606.ENSP00000478570 | 0 | 0 | 0 | 0     | 0.069 | 0     | 0.9 | 0.809 | 0.980 |
| IGF2R | SORT1    | 9606.ENSP00000349437 | 9606.ENSP00000256637 | 0 | 0 | 0 | 0     | 0.061 | 0.108 | 0.9 | 0.667 | 0.968 |

|        |       |                      |                      |   |   |   |       |       |       |     |       |       |
|--------|-------|----------------------|----------------------|---|---|---|-------|-------|-------|-----|-------|-------|
| IGFBP3 | MMP2  | 9606.ENSP00000370473 | 9606.ENSP00000219070 | 0 | 0 | 0 | 0     | 0.196 | 0.379 | 0.9 | 0.413 | 0.966 |
| IGFBP3 | PLG   | 9606.ENSP00000370473 | 9606.ENSP00000308938 | 0 | 0 | 0 | 0     | 0     | 0.379 | 0.9 | 0.64  | 0.975 |
| IGFBP3 | MMP1  | 9606.ENSP00000370473 | 9606.ENSP00000322788 | 0 | 0 | 0 | 0     | 0.142 | 0.379 | 0.9 | 0.327 | 0.959 |
| IGFBP3 | MAPK8 | 9606.ENSP00000370473 | 9606.ENSP00000378974 | 0 | 0 | 0 | 0     | 0     | 0     | 0.9 | 0.292 | 0.926 |
| IGFBP3 | SPP1  | 9606.ENSP00000370473 | 9606.ENSP00000378517 | 0 | 0 | 0 | 0     | 0.07  | 0     | 0.9 | 0.359 | 0.935 |
| IGFBP3 | IL6   | 9606.ENSP00000370473 | 9606.ENSP00000385675 | 0 | 0 | 0 | 0     | 0.076 | 0     | 0.9 | 0.536 | 0.953 |
| IKBKB  | TP63  | 9606.ENSP00000430684 | 9606.ENSP00000264731 | 0 | 0 | 0 | 0     | 0     | 0.379 | 0.9 | 0.139 | 0.941 |
| IKBKB  | PRKCB | 9606.ENSP00000430684 | 9606.ENSP00000305355 | 0 | 0 | 0 | 0.565 | 0     | 0.697 | 0.9 | 0.297 | 0.972 |
| IKBKB  | PRKCE | 9606.ENSP00000430684 | 9606.ENSP00000306124 | 0 | 0 | 0 | 0.559 | 0.062 | 0.398 | 0.9 | 0.304 | 0.946 |
| IKBKB  | MTOR  | 9606.ENSP00000430684 | 9606.ENSP00000354558 | 0 | 0 | 0 | 0     | 0.058 | 0.882 | 0   | 0.316 | 0.917 |
| IKBKB  | RELA  | 9606.ENSP00000430684 | 9606.ENSP00000384273 | 0 | 0 | 0 | 0     | 0.063 | 0.871 | 0.9 | 0.831 | 0.997 |
| IKBKB  | TNF   | 9606.ENSP00000430684 | 9606.ENSP00000398698 | 0 | 0 | 0 | 0     | 0.061 | 0.993 | 0.9 | 0.684 | 0.999 |
| IKBKB  | PRKCA | 9606.ENSP00000430684 | 9606.ENSP00000408695 | 0 | 0 | 0 | 0.567 | 0     | 0.358 | 0.9 | 0.268 | 0.939 |
| IL10   | IL2   | 9606.ENSP00000412237 | 9606.ENSP00000226730 | 0 | 0 | 0 | 0     | 0     | 0     | 0   | 0.956 | 0.957 |
| IL10   | IL1A  | 9606.ENSP00000412237 | 9606.ENSP00000263339 | 0 | 0 | 0 | 0     | 0.063 | 0     | 0.9 | 0.738 | 0.973 |
| IL10   | IL1B  | 9606.ENSP00000412237 | 9606.ENSP00000263341 | 0 | 0 | 0 | 0     | 0.085 | 0     | 0.9 | 0.96  | 0.996 |
| IL10   | STAT3 | 9606.ENSP00000412237 | 9606.ENSP00000264657 | 0 | 0 | 0 | 0     | 0     | 0.429 | 0.9 | 0.933 | 0.995 |
| IL10   | TLR9  | 9606.ENSP00000412237 | 9606.ENSP00000353874 | 0 | 0 | 0 | 0     | 0.055 | 0.157 | 0   | 0.911 | 0.923 |
| IL10   | IL6   | 9606.ENSP00000412237 | 9606.ENSP00000385675 | 0 | 0 | 0 | 0     | 0.077 | 0     | 0.9 | 0.974 | 0.997 |
| IL10   | TNF   | 9606.ENSP00000412237 | 9606.ENSP00000398698 | 0 | 0 | 0 | 0     | 0.097 | 0     | 0.9 | 0.974 | 0.997 |
| IL1A   | STAT3 | 9606.ENSP00000263339 | 9606.ENSP00000264657 | 0 | 0 | 0 | 0     | 0     | 0     | 0.9 | 0.354 | 0.932 |
| IL1A   | RELA  | 9606.ENSP00000263339 | 9606.ENSP00000384273 | 0 | 0 | 0 | 0     | 0     | 0     | 0.9 | 0.355 | 0.932 |
| IL1A   | JUN   | 9606.ENSP00000263339 | 9606.ENSP00000360266 | 0 | 0 | 0 | 0     | 0     | 0     | 0.9 | 0.442 | 0.941 |
| IL1A   | TNF   | 9606.ENSP00000263339 | 9606.ENSP00000398698 | 0 | 0 | 0 | 0     | 0.296 | 0     | 0   | 0.923 | 0.944 |
| IL1A   | IL6   | 9606.ENSP00000263339 | 9606.ENSP00000385675 | 0 | 0 | 0 | 0     | 0.375 | 0     | 0   | 0.918 | 0.946 |
| IL1A   | IL1B  | 9606.ENSP00000263339 | 9606.ENSP00000263341 | 0 | 0 | 0 | 0     | 0.753 | 0     | 0.9 | 0.921 | 0.997 |

|      |        |                      |                      |   |   |   |   |       |       |     |       |       |
|------|--------|----------------------|----------------------|---|---|---|---|-------|-------|-----|-------|-------|
| IL1B | IL2    | 9606.ENSP00000263341 | 9606.ENSP00000226730 | 0 | 0 | 0 | 0 | 0     | 0     | 0   | 0.9   | 0.900 |
| IL1B | PIK3R1 | 9606.ENSP00000263341 | 9606.ENSP00000428056 | 0 | 0 | 0 | 0 | 0     | 0     | 0.9 | 0.138 | 0.910 |
| IL1B | MMP9   | 9606.ENSP00000263341 | 9606.ENSP00000361405 | 0 | 0 | 0 | 0 | 0.2   | 0     | 0   | 0.895 | 0.913 |
| IL1B | PIK3CA | 9606.ENSP00000263341 | 9606.ENSP00000263967 | 0 | 0 | 0 | 0 | 0     | 0     | 0.9 | 0.185 | 0.915 |
| IL1B | RELA   | 9606.ENSP00000263341 | 9606.ENSP00000384273 | 0 | 0 | 0 | 0 | 0     | 0     | 0.9 | 0.559 | 0.954 |
| IL1B | JUN    | 9606.ENSP00000263341 | 9606.ENSP00000360266 | 0 | 0 | 0 | 0 | 0.052 | 0     | 0.8 | 0.82  | 0.963 |
| IL1B | STAT3  | 9606.ENSP00000263341 | 9606.ENSP00000264657 | 0 | 0 | 0 | 0 | 0     | 0     | 0.9 | 0.669 | 0.965 |
| IL1B | PTGS2  | 9606.ENSP00000263341 | 9606.ENSP00000356438 | 0 | 0 | 0 | 0 | 0.561 | 0     | 0   | 0.943 | 0.974 |
| IL1B | IL6    | 9606.ENSP00000263341 | 9606.ENSP00000385675 | 0 | 0 | 0 | 0 | 0.43  | 0     | 0   | 0.973 | 0.984 |
| IL1B | TNF    | 9606.ENSP00000263341 | 9606.ENSP00000398698 | 0 | 0 | 0 | 0 | 0.441 | 0     | 0   | 0.981 | 0.989 |
| IL2  | MAPK1  | 9606.ENSP00000226730 | 9606.ENSP00000215832 | 0 | 0 | 0 | 0 | 0     | 0     | 0.9 | 0.559 | 0.954 |
| IL2  | PRKCE  | 9606.ENSP00000226730 | 9606.ENSP00000306124 | 0 | 0 | 0 | 0 | 0     | 0     | 0.9 | 0.125 | 0.908 |
| IL2  | PRKCB  | 9606.ENSP00000226730 | 9606.ENSP00000305355 | 0 | 0 | 0 | 0 | 0     | 0     | 0.9 | 0.227 | 0.919 |
| IL2  | PIK3CA | 9606.ENSP00000226730 | 9606.ENSP00000263967 | 0 | 0 | 0 | 0 | 0     | 0     | 0.9 | 0.228 | 0.919 |
| IL2  | PIK3R1 | 9606.ENSP00000226730 | 9606.ENSP00000428056 | 0 | 0 | 0 | 0 | 0     | 0     | 0.9 | 0.232 | 0.919 |
| IL2  | TNF    | 9606.ENSP00000226730 | 9606.ENSP00000398698 | 0 | 0 | 0 | 0 | 0     | 0     | 0   | 0.956 | 0.957 |
| IL2  | TERT   | 9606.ENSP00000226730 | 9606.ENSP00000309572 | 0 | 0 | 0 | 0 | 0     | 0     | 0.9 | 0.599 | 0.958 |
| IL2  | MTOR   | 9606.ENSP00000226730 | 9606.ENSP00000354558 | 0 | 0 | 0 | 0 | 0     | 0     | 0.9 | 0.615 | 0.959 |
| IL2  | IL6    | 9606.ENSP00000226730 | 9606.ENSP00000385675 | 0 | 0 | 0 | 0 | 0     | 0     | 0   | 0.958 | 0.959 |
| IL2  | STAT1  | 9606.ENSP00000226730 | 9606.ENSP00000354394 | 0 | 0 | 0 | 0 | 0     | 0     | 0.9 | 0.672 | 0.965 |
| IL2  | STAT3  | 9606.ENSP00000226730 | 9606.ENSP00000264657 | 0 | 0 | 0 | 0 | 0     | 0     | 0.9 | 0.705 | 0.969 |
| IL2  | JUN    | 9606.ENSP00000226730 | 9606.ENSP00000360266 | 0 | 0 | 0 | 0 | 0     | 0.313 | 0.9 | 0.621 | 0.971 |
| IL2  | MAPK8  | 9606.ENSP00000226730 | 9606.ENSP00000378974 | 0 | 0 | 0 | 0 | 0     | 0     | 0.9 | 0.769 | 0.975 |
| IL2  | RELA   | 9606.ENSP00000226730 | 9606.ENSP00000384273 | 0 | 0 | 0 | 0 | 0     | 0.342 | 0.9 | 0.694 | 0.978 |
| IL6  | MAPK1  | 9606.ENSP00000385675 | 9606.ENSP00000215832 | 0 | 0 | 0 | 0 | 0     | 0     | 0.9 | 0.834 | 0.982 |
| IL6  | STAT3  | 9606.ENSP00000385675 | 9606.ENSP00000264657 | 0 | 0 | 0 | 0 | 0     | 0.269 | 0.9 | 0.97  | 0.997 |

|       |        |                      |                      |   |   |   |   |       |       |     |       |       |
|-------|--------|----------------------|----------------------|---|---|---|---|-------|-------|-----|-------|-------|
| IL6   | TLR9   | 9606.ENSP00000385675 | 9606.ENSP00000353874 | 0 | 0 | 0 | 0 | 0     | 0     | 0   | 0.905 | 0.905 |
| IL6   | STAT1  | 9606.ENSP00000385675 | 9606.ENSP00000354394 | 0 | 0 | 0 | 0 | 0.058 | 0.163 | 0.9 | 0.818 | 0.983 |
| IL6   | PTGS2  | 9606.ENSP00000385675 | 9606.ENSP00000356438 | 0 | 0 | 0 | 0 | 0.314 | 0     | 0   | 0.922 | 0.945 |
| IL6   | JUN    | 9606.ENSP00000385675 | 9606.ENSP00000360266 | 0 | 0 | 0 | 0 | 0.053 | 0     | 0.9 | 0.85  | 0.984 |
| IL6   | MMP9   | 9606.ENSP00000385675 | 9606.ENSP00000361405 | 0 | 0 | 0 | 0 | 0.074 | 0     | 0   | 0.92  | 0.923 |
| IL6   | SPP1   | 9606.ENSP00000385675 | 9606.ENSP00000378517 | 0 | 0 | 0 | 0 | 0.06  | 0     | 0.9 | 0.793 | 0.978 |
| IL6   | RELA   | 9606.ENSP00000385675 | 9606.ENSP00000384273 | 0 | 0 | 0 | 0 | 0     | 0.223 | 0.9 | 0.804 | 0.983 |
| IL6   | VEGFA  | 9606.ENSP00000385675 | 9606.ENSP00000478570 | 0 | 0 | 0 | 0 | 0.063 | 0     | 0   | 0.957 | 0.959 |
| IL6   | TNF    | 9606.ENSP00000385675 | 9606.ENSP00000398698 | 0 | 0 | 0 | 0 | 0.123 | 0     | 0   | 0.982 | 0.984 |
| INSR  | PIK3CA | 9606.ENSP00000303830 | 9606.ENSP00000263967 | 0 | 0 | 0 | 0 | 0.062 | 0.124 | 0.9 | 0.468 | 0.950 |
| INSR  | PTPRA  | 9606.ENSP00000303830 | 9606.ENSP00000369756 | 0 | 0 | 0 | 0 | 0.062 | 0.16  | 0.9 | 0.084 | 0.918 |
| INSR  | PIK3R1 | 9606.ENSP00000303830 | 9606.ENSP00000428056 | 0 | 0 | 0 | 0 | 0.061 | 0.472 | 0.9 | 0.492 | 0.971 |
| INSR  | PTPN1  | 9606.ENSP00000303830 | 9606.ENSP00000360683 | 0 | 0 | 0 | 0 | 0.062 | 0.972 | 0.9 | 0.418 | 0.998 |
| ITGB1 | PIK3CA | 9606.ENSP00000379350 | 9606.ENSP00000263967 | 0 | 0 | 0 | 0 | 0.064 | 0     | 0.9 | 0.208 | 0.919 |
| ITGB1 | STAT3  | 9606.ENSP00000379350 | 9606.ENSP00000264657 | 0 | 0 | 0 | 0 | 0.063 | 0     | 0.9 | 0.35  | 0.933 |
| ITGB1 | VCAM1  | 9606.ENSP00000379350 | 9606.ENSP00000294728 | 0 | 0 | 0 | 0 | 0.129 | 0.379 | 0.9 | 0.73  | 0.983 |
| ITGB1 | MET    | 9606.ENSP00000379350 | 9606.ENSP00000317272 | 0 | 0 | 0 | 0 | 0.092 | 0.157 | 0.9 | 0.358 | 0.944 |
| ITGB1 | STAT1  | 9606.ENSP00000379350 | 9606.ENSP00000354394 | 0 | 0 | 0 | 0 | 0.061 | 0     | 0.9 | 0.205 | 0.918 |
| ITGB1 | SPP1   | 9606.ENSP00000379350 | 9606.ENSP00000378517 | 0 | 0 | 0 | 0 | 0.061 | 0.379 | 0.9 | 0.709 | 0.980 |
| ITGB1 | PIK3R1 | 9606.ENSP00000379350 | 9606.ENSP00000428056 | 0 | 0 | 0 | 0 | 0     | 0     | 0.9 | 0.187 | 0.915 |
| ITGB1 | VEGFA  | 9606.ENSP00000379350 | 9606.ENSP00000478570 | 0 | 0 | 0 | 0 | 0     | 0.064 | 0.9 | 0.575 | 0.956 |
| JUN   | MAPK1  | 9606.ENSP00000360266 | 9606.ENSP00000215832 | 0 | 0 | 0 | 0 | 0     | 0.411 | 0.9 | 0.952 | 0.996 |
| JUN   | NR3C1  | 9606.ENSP00000360266 | 9606.ENSP00000231509 | 0 | 0 | 0 | 0 | 0     | 0.472 | 0.9 | 0.739 | 0.985 |
| JUN   | STAT3  | 9606.ENSP00000360266 | 9606.ENSP00000264657 | 0 | 0 | 0 | 0 | 0.055 | 0.476 | 0   | 0.852 | 0.921 |
| JUN   | PPARG  | 9606.ENSP00000360266 | 9606.ENSP00000287820 | 0 | 0 | 0 | 0 | 0     | 0.144 | 0.9 | 0.533 | 0.956 |
| JUN   | NOS3   | 9606.ENSP00000360266 | 9606.ENSP00000297494 | 0 | 0 | 0 | 0 | 0     | 0     | 0.9 | 0.542 | 0.952 |

|       |        |                      |                      |   |   |       |       |       |       |     |       |       |
|-------|--------|----------------------|----------------------|---|---|-------|-------|-------|-------|-----|-------|-------|
| JUN   | NOS2   | 9606.ENSP00000360266 | 9606.ENSP00000327251 | 0 | 0 | 0     | 0     | 0     | 0     | 0.9 | 0.584 | 0.956 |
| JUN   | PPARA  | 9606.ENSP00000360266 | 9606.ENSP00000385523 | 0 | 0 | 0     | 0     | 0     | 0.082 | 0.9 | 0.385 | 0.938 |
| JUN   | NFE2L2 | 9606.ENSP00000360266 | 9606.ENSP00000380252 | 0 | 0 | 0     | 0     | 0     | 0.4   | 0.9 | 0.578 | 0.972 |
| JUN   | RELA   | 9606.ENSP00000360266 | 9606.ENSP00000384273 | 0 | 0 | 0     | 0     | 0.069 | 0.457 | 0.9 | 0.667 | 0.980 |
| JUN   | VEGFA  | 9606.ENSP00000360266 | 9606.ENSP00000478570 | 0 | 0 | 0     | 0     | 0.066 | 0.261 | 0.9 | 0.794 | 0.983 |
| JUN   | TNF    | 9606.ENSP00000360266 | 9606.ENSP00000398698 | 0 | 0 | 0     | 0     | 0     | 0     | 0.9 | 0.871 | 0.986 |
| JUN   | MYC    | 9606.ENSP00000360266 | 9606.ENSP00000479618 | 0 | 0 | 0     | 0     | 0.063 | 0.379 | 0.9 | 0.878 | 0.992 |
| JUN   | MAPK8  | 9606.ENSP00000360266 | 9606.ENSP00000378974 | 0 | 0 | 0     | 0     | 0     | 0.788 | 0.9 | 0.985 | 0.999 |
| MAOA  | MAOB   | 9606.ENSP00000340684 | 9606.ENSP00000367309 | 0 | 0 | 0.448 | 0.976 | 0.18  | 0.685 | 0.8 | 0.931 | 0.945 |
| MAPK1 | RXRG   | 9606.ENSP00000215832 | 9606.ENSP00000352900 | 0 | 0 | 0     | 0     | 0     | 0.073 | 0.9 | 0.051 | 0.904 |
| MAPK1 | TTR    | 9606.ENSP00000215832 | 9606.ENSP00000237014 | 0 | 0 | 0     | 0     | 0     | 0     | 0.9 | 0.185 | 0.915 |
| MAPK1 | PIN1   | 9606.ENSP00000215832 | 9606.ENSP00000247970 | 0 | 0 | 0     | 0     | 0.055 | 0     | 0.9 | 0.193 | 0.917 |
| MAPK1 | PRKCB  | 9606.ENSP00000215832 | 9606.ENSP00000305355 | 0 | 0 | 0     | 0.59  | 0.056 | 0.158 | 0.9 | 0.414 | 0.927 |
| MAPK1 | MAPT   | 9606.ENSP00000215832 | 9606.ENSP00000340820 | 0 | 0 | 0     | 0     | 0     | 0     | 0.8 | 0.662 | 0.929 |
| MAPK1 | MET    | 9606.ENSP00000215832 | 9606.ENSP00000317272 | 0 | 0 | 0     | 0.589 | 0.059 | 0.146 | 0.9 | 0.481 | 0.929 |
| MAPK1 | RARA   | 9606.ENSP00000215832 | 9606.ENSP00000254066 | 0 | 0 | 0     | 0     | 0     | 0.317 | 0.9 | 0.188 | 0.939 |
| MAPK1 | RXRA   | 9606.ENSP00000215832 | 9606.ENSP00000419692 | 0 | 0 | 0     | 0     | 0     | 0.363 | 0.9 | 0.154 | 0.941 |
| MAPK1 | PRKCA  | 9606.ENSP00000215832 | 9606.ENSP00000408695 | 0 | 0 | 0     | 0.594 | 0.056 | 0.261 | 0.9 | 0.575 | 0.941 |
| MAPK1 | MPO    | 9606.ENSP00000215832 | 9606.ENSP00000225275 | 0 | 0 | 0     | 0     | 0     | 0.077 | 0.9 | 0.445 | 0.944 |
| MAPK1 | MAPK8  | 9606.ENSP00000215832 | 9606.ENSP00000378974 | 0 | 0 | 0.386 | 0.886 | 0.081 | 0.384 | 0.9 | 0.98  | 0.947 |
| MAPK1 | PPARA  | 9606.ENSP00000215832 | 9606.ENSP00000385523 | 0 | 0 | 0     | 0     | 0     | 0.399 | 0.9 | 0.264 | 0.951 |
| MAPK1 | NR4A1  | 9606.ENSP00000215832 | 9606.ENSP00000440864 | 0 | 0 | 0     | 0     | 0     | 0.423 | 0.8 | 0.61  | 0.951 |
| MAPK1 | RELA   | 9606.ENSP00000215832 | 9606.ENSP00000384273 | 0 | 0 | 0     | 0     | 0     | 0     | 0.9 | 0.541 | 0.952 |
| MAPK1 | TERT   | 9606.ENSP00000215832 | 9606.ENSP00000309572 | 0 | 0 | 0     | 0     | 0.056 | 0     | 0.9 | 0.569 | 0.955 |
| MAPK1 | PRKCE  | 9606.ENSP00000215832 | 9606.ENSP00000306124 | 0 | 0 | 0     | 0.595 | 0.062 | 0.522 | 0.9 | 0.421 | 0.959 |
| MAPK1 | NR3C1  | 9606.ENSP00000215832 | 9606.ENSP00000231509 | 0 | 0 | 0     | 0     | 0     | 0.399 | 0.9 | 0.413 | 0.961 |

|       |        |                      |                      |   |   |   |       |       |       |     |       |       |
|-------|--------|----------------------|----------------------|---|---|---|-------|-------|-------|-----|-------|-------|
| MAPK1 | PRKCD  | 9606.ENSP00000215832 | 9606.ENSP00000378217 | 0 | 0 | 0 | 0.589 | 0.062 | 0.522 | 0.9 | 0.534 | 0.961 |
| MAPK1 | RUNX2  | 9606.ENSP00000215832 | 9606.ENSP00000360493 | 0 | 0 | 0 | 0     | 0     | 0     | 0.9 | 0.74  | 0.972 |
| MAPK1 | STAT1  | 9606.ENSP00000215832 | 9606.ENSP00000354394 | 0 | 0 | 0 | 0     | 0.06  | 0.263 | 0.9 | 0.649 | 0.972 |
| MAPK1 | MYC    | 9606.ENSP00000215832 | 9606.ENSP00000479618 | 0 | 0 | 0 | 0     | 0     | 0.379 | 0.9 | 0.798 | 0.986 |
| MAPK1 | STAT3  | 9606.ENSP00000215832 | 9606.ENSP00000264657 | 0 | 0 | 0 | 0     | 0.06  | 0.384 | 0.9 | 0.837 | 0.989 |
| MAPK8 | NR3C1  | 9606.ENSP00000378974 | 9606.ENSP00000231509 | 0 | 0 | 0 | 0     | 0.054 | 0.379 | 0.9 | 0.476 | 0.965 |
| MAPK8 | RARA   | 9606.ENSP00000378974 | 9606.ENSP00000254066 | 0 | 0 | 0 | 0     | 0     | 0     | 0.9 | 0.218 | 0.918 |
| MAPK8 | SORT1  | 9606.ENSP00000378974 | 9606.ENSP00000256637 | 0 | 0 | 0 | 0     | 0.079 | 0     | 0.9 | 0.267 | 0.926 |
| MAPK8 | STAT3  | 9606.ENSP00000378974 | 9606.ENSP00000264657 | 0 | 0 | 0 | 0     | 0     | 0.379 | 0   | 0.854 | 0.906 |
| MAPK8 | PRKCB  | 9606.ENSP00000378974 | 9606.ENSP00000305355 | 0 | 0 | 0 | 0.576 | 0.049 | 0     | 0.9 | 0.478 | 0.92  |
| MAPK8 | MET    | 9606.ENSP00000378974 | 9606.ENSP00000317272 | 0 | 0 | 0 | 0.56  | 0.062 | 0.073 | 0.9 | 0.447 | 0.923 |
| MAPK8 | MAPT   | 9606.ENSP00000378974 | 9606.ENSP00000340820 | 0 | 0 | 0 | 0     | 0.064 | 0.294 | 0.9 | 0.479 | 0.961 |
| MAPK8 | TNF    | 9606.ENSP00000378974 | 9606.ENSP00000398698 | 0 | 0 | 0 | 0     | 0     | 0     | 0   | 0.91  | 0.910 |
| MAPK8 | RXRA   | 9606.ENSP00000378974 | 9606.ENSP00000419692 | 0 | 0 | 0 | 0     | 0     | 0     | 0.9 | 0.262 | 0.923 |
| MAPK8 | RELA   | 9606.ENSP00000378974 | 9606.ENSP00000384273 | 0 | 0 | 0 | 0     | 0     | 0     | 0.8 | 0.769 | 0.952 |
| MET   | PIK3CA | 9606.ENSP00000317272 | 9606.ENSP00000263967 | 0 | 0 | 0 | 0     | 0.063 | 0.124 | 0.9 | 0.586 | 0.961 |
| MET   | STAT3  | 9606.ENSP00000317272 | 9606.ENSP00000264657 | 0 | 0 | 0 | 0     | 0.062 | 0.432 | 0.9 | 0.647 | 0.978 |
| MET   | VEGFA  | 9606.ENSP00000317272 | 9606.ENSP00000478570 | 0 | 0 | 0 | 0     | 0.067 | 0     | 0.6 | 0.826 | 0.929 |
| MET   | PIK3R1 | 9606.ENSP00000317272 | 9606.ENSP00000428056 | 0 | 0 | 0 | 0     | 0     | 0.407 | 0.9 | 0.262 | 0.952 |
| MET   | PTPN1  | 9606.ENSP00000317272 | 9606.ENSP00000360683 | 0 | 0 | 0 | 0     | 0.062 | 0.538 | 0.9 | 0.323 | 0.966 |
| MMP1  | MMP2   | 9606.ENSP00000322788 | 9606.ENSP00000219070 | 0 | 0 | 0 | 0.869 | 0.154 | 0     | 0.9 | 0.921 | 0.922 |
| MMP1  | MMP13  | 9606.ENSP00000322788 | 9606.ENSP00000260302 | 0 | 0 | 0 | 0.935 | 0.077 | 0     | 0.9 | 0.863 | 0.909 |
| MMP1  | STAT3  | 9606.ENSP00000322788 | 9606.ENSP00000264657 | 0 | 0 | 0 | 0     | 0     | 0     | 0.9 | 0.674 | 0.966 |
| MMP1  | PLG    | 9606.ENSP00000322788 | 9606.ENSP00000308938 | 0 | 0 | 0 | 0     | 0.063 | 0     | 0.9 | 0.615 | 0.960 |
| MMP1  | MMP9   | 9606.ENSP00000322788 | 9606.ENSP00000361405 | 0 | 0 | 0 | 0.75  | 0.518 | 0     | 0.9 | 0.91  | 0.961 |
| MMP13 | MMP2   | 9606.ENSP00000260302 | 9606.ENSP00000219070 | 0 | 0 | 0 | 0.89  | 0.061 | 0     | 0.9 | 0.835 | 0.911 |

|       |        |                      |                      |   |   |   |       |       |       |     |       |       |
|-------|--------|----------------------|----------------------|---|---|---|-------|-------|-------|-----|-------|-------|
| MMP13 | MMP9   | 9606.ENSP00000260302 | 9606.ENSP00000361405 | 0 | 0 | 0 | 0.797 | 0.064 | 0     | 0.9 | 0.878 | 0.919 |
| MMP13 | PLG    | 9606.ENSP00000260302 | 9606.ENSP00000308938 | 0 | 0 | 0 | 0     | 0.063 | 0     | 0.9 | 0.507 | 0.949 |
| MMP2  | MMP9   | 9606.ENSP00000219070 | 9606.ENSP00000361405 | 0 | 0 | 0 | 0.929 | 0.061 | 0     | 0.9 | 0.958 | 0.908 |
| MMP2  | STAT3  | 9606.ENSP00000219070 | 9606.ENSP00000264657 | 0 | 0 | 0 | 0     | 0     | 0     | 0.9 | 0.799 | 0.979 |
| MMP2  | VEGFA  | 9606.ENSP00000219070 | 9606.ENSP00000478570 | 0 | 0 | 0 | 0     | 0.065 | 0     | 0.8 | 0.899 | 0.979 |
| MMP9  | STAT3  | 9606.ENSP00000361405 | 9606.ENSP00000264657 | 0 | 0 | 0 | 0     | 0     | 0     | 0.9 | 0.824 | 0.981 |
| MMP9  | PLG    | 9606.ENSP00000361405 | 9606.ENSP00000308938 | 0 | 0 | 0 | 0     | 0.063 | 0.379 | 0.9 | 0.863 | 0.991 |
| MMP9  | TNF    | 9606.ENSP00000361405 | 9606.ENSP00000398698 | 0 | 0 | 0 | 0     | 0.176 | 0     | 0   | 0.935 | 0.944 |
| MMP9  | VEGFA  | 9606.ENSP00000361405 | 9606.ENSP00000478570 | 0 | 0 | 0 | 0     | 0     | 0     | 0.8 | 0.946 | 0.989 |
| MPI   | PFKFB3 | 9606.ENSP00000318318 | 9606.ENSP00000443319 | 0 | 0 | 0 | 0     | 0.063 | 0.05  | 0.9 | 0.173 | 0.916 |
| MPO   | PRKCD  | 9606.ENSP00000225275 | 9606.ENSP00000378217 | 0 | 0 | 0 | 0     | 0     | 0.064 | 0.9 | 0.069 | 0.905 |
| MPO   | TTR    | 9606.ENSP00000225275 | 9606.ENSP00000237014 | 0 | 0 | 0 | 0     | 0     | 0     | 0.9 | 0.242 | 0.921 |
| MPO   | PTGS1  | 9606.ENSP00000225275 | 9606.ENSP00000354612 | 0 | 0 | 0 | 0     | 0.076 | 0     | 0.9 | 0.408 | 0.940 |
| MTOR  | PIK3CA | 9606.ENSP00000354558 | 9606.ENSP00000263967 | 0 | 0 | 0 | 0.541 | 0.061 | 0.186 | 0.9 | 0.73  | 0.944 |
| MTOR  | STAT3  | 9606.ENSP00000354558 | 9606.ENSP00000264657 | 0 | 0 | 0 | 0     | 0.049 | 0.379 | 0.9 | 0.835 | 0.989 |
| MTOR  | PPARG  | 9606.ENSP00000354558 | 9606.ENSP00000287820 | 0 | 0 | 0 | 0     | 0     | 0     | 0.8 | 0.529 | 0.901 |
| MTOR  | TERT   | 9606.ENSP00000354558 | 9606.ENSP00000309572 | 0 | 0 | 0 | 0     | 0     | 0.464 | 0.9 | 0.371 | 0.963 |
| MTOR  | RELA   | 9606.ENSP00000354558 | 9606.ENSP00000384273 | 0 | 0 | 0 | 0     | 0     | 0     | 0.9 | 0.33  | 0.930 |
| MTOR  | PRKCA  | 9606.ENSP00000354558 | 9606.ENSP00000408695 | 0 | 0 | 0 | 0     | 0     | 0.234 | 0.9 | 0.372 | 0.947 |
| MTOR  | PIK3R1 | 9606.ENSP00000354558 | 9606.ENSP00000428056 | 0 | 0 | 0 | 0     | 0.061 | 0.269 | 0.9 | 0.491 | 0.960 |
| MYC   | PIN1   | 9606.ENSP00000479618 | 9606.ENSP00000247970 | 0 | 0 | 0 | 0     | 0     | 0.379 | 0.9 | 0.268 | 0.950 |
| MYC   | PIK3CA | 9606.ENSP00000479618 | 9606.ENSP00000263967 | 0 | 0 | 0 | 0     | 0     | 0.201 | 0.9 | 0.648 | 0.969 |
| MYC   | STAT3  | 9606.ENSP00000479618 | 9606.ENSP00000264657 | 0 | 0 | 0 | 0     | 0     | 0.379 | 0.9 | 0.859 | 0.990 |
| MYC   | TERT   | 9606.ENSP00000479618 | 9606.ENSP00000309572 | 0 | 0 | 0 | 0     | 0.077 | 0.139 | 0.9 | 0.884 | 0.989 |
| MYC   | NOS2   | 9606.ENSP00000479618 | 9606.ENSP00000327251 | 0 | 0 | 0 | 0     | 0     | 0     | 0.9 | 0.222 | 0.918 |
| MYC   | RELA   | 9606.ENSP00000479618 | 9606.ENSP00000384273 | 0 | 0 | 0 | 0     | 0     | 0.379 | 0.9 | 0.587 | 0.972 |



|        |        |                      |                      |   |   |   |       |       |       |      |       |       |
|--------|--------|----------------------|----------------------|---|---|---|-------|-------|-------|------|-------|-------|
| MYC    | PPARA  | 9606.ENSP00000479618 | 9606.ENSP00000385523 | 0 | 0 | 0 | 0     | 0     | 0     | 0.9  | 0.355 | 0.932 |
| MYC    | TNF    | 9606.ENSP00000479618 | 9606.ENSP00000398698 | 0 | 0 | 0 | 0     | 0.062 | 0     | 0.9  | 0.769 | 0.976 |
| MYC    | RXRA   | 9606.ENSP00000479618 | 9606.ENSP00000419692 | 0 | 0 | 0 | 0     | 0     | 0     | 0.9  | 0.299 | 0.926 |
| MYC    | PIK3R1 | 9606.ENSP00000479618 | 9606.ENSP00000428056 | 0 | 0 | 0 | 0     | 0     | 0.133 | 0.9  | 0.421 | 0.945 |
| NCF1   | NOX4   | 9606.ENSP00000289473 | 9606.ENSP00000263317 | 0 | 0 | 0 | 0     | 0.055 | 0     | 0.36 | 0.898 | 0.933 |
| NCF1   | PRKCA  | 9606.ENSP00000289473 | 9606.ENSP00000408695 | 0 | 0 | 0 | 0     | 0     | 0.336 | 0.8  | 0.31  | 0.900 |
| NCF1   | PRKCB  | 9606.ENSP00000289473 | 9606.ENSP00000305355 | 0 | 0 | 0 | 0     | 0.088 | 0.379 | 0.8  | 0.297 | 0.909 |
| NCF1   | VCAM1  | 9606.ENSP00000289473 | 9606.ENSP00000294728 | 0 | 0 | 0 | 0     | 0.062 | 0     | 0.9  | 0.444 | 0.943 |
| NFE2L2 | PRKCB  | 9606.ENSP00000380252 | 9606.ENSP00000305355 | 0 | 0 | 0 | 0     | 0     | 0     | 0.9  | 0.111 | 0.907 |
| NFE2L2 | NQO1   | 9606.ENSP00000380252 | 9606.ENSP00000319788 | 0 | 0 | 0 | 0     | 0     | 0     | 0    | 0.94  | 0.941 |
| NFE2L2 | PRKCA  | 9606.ENSP00000380252 | 9606.ENSP00000408695 | 0 | 0 | 0 | 0     | 0     | 0.379 | 0.9  | 0.145 | 0.942 |
| NOS2   | STAT3  | 9606.ENSP00000327251 | 9606.ENSP00000264657 | 0 | 0 | 0 | 0     | 0     | 0     | 0.9  | 0.575 | 0.955 |
| NOS2   | PTGS2  | 9606.ENSP00000327251 | 9606.ENSP00000356438 | 0 | 0 | 0 | 0     | 0.063 | 0.299 | 0    | 0.868 | 0.906 |
| NOS2   | RXRA   | 9606.ENSP00000327251 | 9606.ENSP00000419692 | 0 | 0 | 0 | 0     | 0     | 0.091 | 0.9  | 0.087 | 0.909 |
| NOS2   | PPARA  | 9606.ENSP00000327251 | 9606.ENSP00000385523 | 0 | 0 | 0 | 0     | 0     | 0.091 | 0.9  | 0.211 | 0.922 |
| NOS2   | RELA   | 9606.ENSP00000327251 | 9606.ENSP00000384273 | 0 | 0 | 0 | 0     | 0     | 0.343 | 0.9  | 0.327 | 0.951 |
| NOS2   | TNF    | 9606.ENSP00000327251 | 9606.ENSP00000398698 | 0 | 0 | 0 | 0     | 0.063 | 0     | 0.9  | 0.844 | 0.984 |
| NOS3   | PRKCD  | 9606.ENSP00000297494 | 9606.ENSP00000378217 | 0 | 0 | 0 | 0     | 0     | 0.08  | 0.9  | 0.528 | 0.952 |
| NOS3   | VEGFA  | 9606.ENSP00000297494 | 9606.ENSP00000478570 | 0 | 0 | 0 | 0     | 0.062 | 0     | 0.9  | 0.934 | 0.993 |
| NOX4   | PTPN1  | 9606.ENSP00000263317 | 9606.ENSP00000360683 | 0 | 0 | 0 | 0     | 0.05  | 0     | 0.9  | 0.515 | 0.949 |
| NQO1   | TP63   | 9606.ENSP00000319788 | 9606.ENSP00000264731 | 0 | 0 | 0 | 0     | 0     | 0     | 0.9  | 0.066 | 0.902 |
| NR1I2  | RXRA   | 9606.ENSP00000336528 | 9606.ENSP00000419692 | 0 | 0 | 0 | 0.631 | 0.061 | 0.89  | 0    | 0.639 | 0.917 |
| NR3C1  | PIK3CA | 9606.ENSP00000231509 | 9606.ENSP00000263967 | 0 | 0 | 0 | 0     | 0.081 | 0     | 0.9  | 0.19  | 0.919 |
| NR3C1  | PIK3R1 | 9606.ENSP00000231509 | 9606.ENSP00000428056 | 0 | 0 | 0 | 0     | 0.062 | 0.081 | 0.9  | 0.211 | 0.922 |
| NR3C1  | RXRA   | 9606.ENSP00000231509 | 9606.ENSP00000419692 | 0 | 0 | 0 | 0.632 | 0     | 0     | 0.9  | 0.641 | 0.923 |
| NR3C1  | STAT1  | 9606.ENSP00000231509 | 9606.ENSP00000354394 | 0 | 0 | 0 | 0     | 0.065 | 0.053 | 0.9  | 0.4   | 0.939 |

|        |          |                      |                      |   |   |   |       |       |       |     |       |       |
|--------|----------|----------------------|----------------------|---|---|---|-------|-------|-------|-----|-------|-------|
| NR3C1  | NR3C2    | 9606.ENSP00000231509 | 9606.ENSP00000350815 | 0 | 0 | 0 | 0.861 | 0     | 0.379 | 0.9 | 0.942 | 0.943 |
| NR3C1  | RARA     | 9606.ENSP00000231509 | 9606.ENSP00000254066 | 0 | 0 | 0 | 0.614 | 0     | 0.43  | 0.9 | 0.377 | 0.948 |
| NR3C1  | TNF      | 9606.ENSP00000231509 | 9606.ENSP00000398698 | 0 | 0 | 0 | 0     | 0     | 0     | 0.9 | 0.577 | 0.955 |
| NR3C1  | RELA     | 9606.ENSP00000231509 | 9606.ENSP00000384273 | 0 | 0 | 0 | 0     | 0     | 0.393 | 0.9 | 0.443 | 0.963 |
| NR4A1  | RXRG     | 9606.ENSP00000440864 | 9606.ENSP00000352900 | 0 | 0 | 0 | 0.749 | 0     | 0.42  | 0.9 | 0.223 | 0.942 |
| NR4A1  | RXRA     | 9606.ENSP00000440864 | 9606.ENSP00000419692 | 0 | 0 | 0 | 0.752 | 0     | 0.47  | 0.9 | 0.411 | 0.950 |
| OPRM1  | STAT3    | 9606.ENSP00000394624 | 9606.ENSP00000264657 | 0 | 0 | 0 | 0     | 0     | 0     | 0.9 | 0.222 | 0.918 |
| PIK3CA | RELA     | 9606.ENSP00000263967 | 9606.ENSP00000384273 | 0 | 0 | 0 | 0     | 0     | 0     | 0.9 | 0.26  | 0.922 |
| PIK3CA | PTPN1    | 9606.ENSP00000263967 | 9606.ENSP00000360683 | 0 | 0 | 0 | 0     | 0.061 | 0.172 | 0.9 | 0.137 | 0.923 |
| PIK3CA | PIK3CG   | 9606.ENSP00000263967 | 9606.ENSP00000352121 | 0 | 0 | 0 | 0.815 | 0.061 | 0.154 | 0.9 | 0.729 | 0.925 |
| PIK3CA | STAT3    | 9606.ENSP00000263967 | 9606.ENSP00000264657 | 0 | 0 | 0 | 0     | 0.049 | 0     | 0.9 | 0.454 | 0.943 |
| PIK3CA | VEGFA    | 9606.ENSP00000263967 | 9606.ENSP00000478570 | 0 | 0 | 0 | 0     | 0     | 0     | 0.9 | 0.535 | 0.951 |
| PIK3CA | PRKCD    | 9606.ENSP00000263967 | 9606.ENSP00000378217 | 0 | 0 | 0 | 0     | 0.064 | 0.459 | 0.9 | 0.198 | 0.954 |
| PIK3CA | PIK3R1   | 9606.ENSP00000263967 | 9606.ENSP00000428056 | 0 | 0 | 0 | 0     | 0.082 | 0.974 | 0.9 | 0.899 | 0.999 |
| PIK3CG | PIK3R1   | 9606.ENSP00000352121 | 9606.ENSP00000428056 | 0 | 0 | 0 | 0     | 0.061 | 0.446 | 0.9 | 0.691 | 0.981 |
| PIK3R1 | STAT3    | 9606.ENSP00000428056 | 9606.ENSP00000264657 | 0 | 0 | 0 | 0     | 0     | 0.513 | 0.9 | 0.599 | 0.978 |
| PIK3R1 | PTPN1    | 9606.ENSP00000428056 | 9606.ENSP00000360683 | 0 | 0 | 0 | 0     | 0     | 0.123 | 0.9 | 0.234 | 0.927 |
| PIK3R1 | PRKCD    | 9606.ENSP00000428056 | 9606.ENSP00000378217 | 0 | 0 | 0 | 0     | 0     | 0.079 | 0.9 | 0.265 | 0.926 |
| PIK3R1 | RELA     | 9606.ENSP00000428056 | 9606.ENSP00000384273 | 0 | 0 | 0 | 0     | 0     | 0     | 0.9 | 0.236 | 0.920 |
| PIK3R1 | VEGFA    | 9606.ENSP00000428056 | 9606.ENSP00000478570 | 0 | 0 | 0 | 0     | 0     | 0     | 0.9 | 0.313 | 0.928 |
| PLG    | SERPINE1 | 9606.ENSP00000308938 | 9606.ENSP00000223095 | 0 | 0 | 0 | 0     | 0.063 | 0.435 | 0.9 | 0.978 | 0.998 |
| PLG    | VEGFA    | 9606.ENSP00000308938 | 9606.ENSP00000478570 | 0 | 0 | 0 | 0     | 0     | 0     | 0.9 | 0.708 | 0.969 |
| PPARA  | RXRG     | 9606.ENSP00000385523 | 9606.ENSP00000352900 | 0 | 0 | 0 | 0.696 | 0.062 | 0.399 | 0.9 | 0.474 | 0.947 |
| PPARA  | RELA     | 9606.ENSP00000385523 | 9606.ENSP00000384273 | 0 | 0 | 0 | 0     | 0     | 0.393 | 0.9 | 0.21  | 0.947 |
| PPARA  | TNF      | 9606.ENSP00000385523 | 9606.ENSP00000398698 | 0 | 0 | 0 | 0     | 0     | 0     | 0.9 | 0.538 | 0.951 |
| PPARA  | RXRA     | 9606.ENSP00000385523 | 9606.ENSP00000419692 | 0 | 0 | 0 | 0.695 | 0.062 | 0.478 | 0.9 | 0.715 | 0.958 |

|       |        |                      |                      |   |   |   |       |       |       |     |       |       |
|-------|--------|----------------------|----------------------|---|---|---|-------|-------|-------|-----|-------|-------|
| PPARD | RXRG   | 9606.ENSP00000310928 | 9606.ENSP00000352900 | 0 | 0 | 0 | 0.689 | 0     | 0.399 | 0.9 | 0.474 | 0.946 |
| PPARD | RXRA   | 9606.ENSP00000310928 | 9606.ENSP00000419692 | 0 | 0 | 0 | 0.705 | 0.062 | 0.467 | 0.9 | 0.604 | 0.955 |
| PPARG | RELA   | 9606.ENSP00000287820 | 9606.ENSP00000384273 | 0 | 0 | 0 | 0     | 0     | 0.472 | 0.9 | 0.348 | 0.962 |
| PPARG | SLC2A4 | 9606.ENSP00000287820 | 9606.ENSP00000320935 | 0 | 0 | 0 | 0     | 0.061 | 0     | 0.9 | 0.736 | 0.973 |
| PPARG | TNF    | 9606.ENSP00000287820 | 9606.ENSP00000398698 | 0 | 0 | 0 | 0     | 0     | 0     | 0.9 | 0.827 | 0.982 |
| PPARG | RXRG   | 9606.ENSP00000287820 | 9606.ENSP00000352900 | 0 | 0 | 0 | 0.702 | 0     | 0.816 | 0.9 | 0.467 | 0.983 |
| PPARG | RXRA   | 9606.ENSP00000287820 | 9606.ENSP00000419692 | 0 | 0 | 0 | 0.694 | 0.061 | 0.961 | 0.9 | 0.821 | 0.997 |
| PRKCA | RARA   | 9606.ENSP00000408695 | 9606.ENSP00000254066 | 0 | 0 | 0 | 0     | 0     | 0.379 | 0.9 | 0.155 | 0.943 |
| PRKCA | PRKCB  | 9606.ENSP00000408695 | 9606.ENSP00000305355 | 0 | 0 | 0 | 0.981 | 0     | 0.39  | 0.9 | 0.9   | 0.937 |
| PRKCA | PRKCE  | 9606.ENSP00000408695 | 9606.ENSP00000306124 | 0 | 0 | 0 | 0.924 | 0.055 | 0.871 | 0.9 | 0.733 | 0.987 |
| PRKCA | TERT   | 9606.ENSP00000408695 | 9606.ENSP00000309572 | 0 | 0 | 0 | 0     | 0     | 0.379 | 0.9 | 0.172 | 0.944 |
| PRKCA | RXRG   | 9606.ENSP00000408695 | 9606.ENSP00000352900 | 0 | 0 | 0 | 0     | 0     | 0     | 0.9 | 0     | 0.900 |
| PRKCA | PRKCD  | 9606.ENSP00000408695 | 9606.ENSP00000378217 | 0 | 0 | 0 | 0.891 | 0     | 0     | 0.9 | 0.731 | 0.907 |
| PRKCA | RELA   | 9606.ENSP00000408695 | 9606.ENSP00000384273 | 0 | 0 | 0 | 0     | 0     | 0     | 0.9 | 0.214 | 0.918 |
| PRKCA | RXRA   | 9606.ENSP00000408695 | 9606.ENSP00000419692 | 0 | 0 | 0 | 0     | 0     | 0     | 0.9 | 0.123 | 0.908 |
| PRKCB | PRKCE  | 9606.ENSP00000305355 | 9606.ENSP00000306124 | 0 | 0 | 0 | 0.922 | 0.055 | 0     | 0.9 | 0.617 | 0.906 |
| PRKCB | RELA   | 9606.ENSP00000305355 | 9606.ENSP00000384273 | 0 | 0 | 0 | 0     | 0     | 0     | 0.9 | 0.222 | 0.918 |
| PRKCB | PRKCD  | 9606.ENSP00000305355 | 9606.ENSP00000378217 | 0 | 0 | 0 | 0.89  | 0     | 0.752 | 0.9 | 0.632 | 0.975 |
| PRKCD | TTR    | 9606.ENSP00000378217 | 9606.ENSP00000237014 | 0 | 0 | 0 | 0     | 0     | 0     | 0.9 | 0.106 | 0.906 |
| PRKCD | STAT3  | 9606.ENSP00000378217 | 9606.ENSP00000264657 | 0 | 0 | 0 | 0     | 0.061 | 0.394 | 0.9 | 0.321 | 0.956 |
| PRKCD | PRKCE  | 9606.ENSP00000378217 | 9606.ENSP00000306124 | 0 | 0 | 0 | 0.919 | 0     | 0     | 0.9 | 0.779 | 0.906 |
| PRKCD | STAT1  | 9606.ENSP00000378217 | 9606.ENSP00000354394 | 0 | 0 | 0 | 0     | 0.061 | 0.394 | 0.9 | 0.298 | 0.954 |
| PRKCD | RELA   | 9606.ENSP00000378217 | 9606.ENSP00000384273 | 0 | 0 | 0 | 0     | 0.061 | 0     | 0.9 | 0.22  | 0.920 |
| PRKDC | TBK1   | 9606.ENSP00000313420 | 9606.ENSP00000329967 | 0 | 0 | 0 | 0     | 0.058 | 0.124 | 0.9 | 0.173 | 0.922 |
| PTGS2 | STAT3  | 9606.ENSP00000356438 | 9606.ENSP00000264657 | 0 | 0 | 0 | 0     | 0     | 0     | 0.9 | 0.81  | 0.980 |
| PTGS2 | VEGFA  | 9606.ENSP00000356438 | 9606.ENSP00000478570 | 0 | 0 | 0 | 0     | 0.082 | 0     | 0   | 0.914 | 0.918 |

|          |        |                      |                      |                      |   |   |       |       |       |     |       |       |
|----------|--------|----------------------|----------------------|----------------------|---|---|-------|-------|-------|-----|-------|-------|
| PTGS2    | TNF    | 9606.ENSP00000356438 | 9606.ENSP00000398698 | 0                    | 0 | 0 | 0     | 0.096 | 0     | 0   | 0.921 | 0.926 |
| RARA     | VDR    | 9606.ENSP00000254066 | 9606.ENSP00000447173 | 0                    | 0 | 0 | 0.697 | 0     | 0     | 0.9 | 0.497 | 0.914 |
| RARA     | RXRG   | 9606.ENSP00000254066 | 9606.ENSP00000352900 | 0                    | 0 | 0 | 0.791 | 0.059 | 0.838 | 0.9 | 0.562 | 0.985 |
| RARA     | RXRA   | 9606.ENSP00000254066 | 9606.ENSP00000419692 | 0                    | 0 | 0 | 0.773 | 0.088 | 0.979 | 0.9 | 0.747 | 0.998 |
| RELA     | TBK1   | 9606.ENSP00000384273 | 9606.ENSP00000329967 | 0                    | 0 | 0 | 0     | 0.125 | 0.313 | 0.8 | 0.517 | 0.934 |
| RELA     | TNF    | 9606.ENSP00000384273 | 9606.ENSP00000398698 | 0                    | 0 | 0 | 0     | 0     | 0.428 | 0.9 | 0.849 | 0.990 |
| RUNX2    | VDR    | 9606.ENSP00000360493 | 9606.ENSP00000447173 | 0                    | 0 | 0 | 0     | 0.062 | 0.727 | 0   | 0.738 | 0.927 |
| RUNX2    | SPP1   | 9606.ENSP00000360493 | 9606.ENSP00000378517 | 0                    | 0 | 0 | 0     | 0.062 | 0     | 0   | 0.94  | 0.942 |
| RXRA     | SLC2A4 | 9606.ENSP00000419692 | 9606.ENSP00000320935 | 0                    | 0 | 0 | 0     | 0.061 | 0     | 0.9 | 0.198 | 0.918 |
| RXRA     | RXRG   | 9606.ENSP00000419692 | 9606.ENSP00000352900 | 0                    | 0 | 0 | 0.971 | 0     | 0.68  | 0.9 | 0.7   | 0.967 |
| RXRA     | TNF    | 9606.ENSP00000419692 | 9606.ENSP00000398698 | 0                    | 0 | 0 | 0     | 0     | 0     | 0.9 | 0.215 | 0.918 |
| RXRA     | VDR    | 9606.ENSP00000419692 | 9606.ENSP00000447173 | 0                    | 0 | 0 | 0.635 | 0     | 0.438 | 0.9 | 0.677 | 0.955 |
| RXRG     | VDR    | 9606.ENSP00000352900 | 9606.ENSP00000447173 | 0                    | 0 | 0 | 0.647 | 0     | 0.36  | 0.9 | 0.34  | 0.940 |
| SERPINE1 | VEGFA  | 9606.ENSP00000223095 | 9606.ENSP00000478570 | 0                    | 0 | 0 | 0     | 0.076 | 0     | 0.9 | 0.821 | 0.982 |
| STAT1    | STAT3  | 9606.ENSP00000354394 | 9606.ENSP00000264657 | 0                    | 0 | 0 | 0.948 | 0.062 | 0.713 | 0.9 | 0.95  | 0.972 |
| STAT1    | VCAM1  | 9606.ENSP00000354394 | 9606.ENSP00000294728 | 0                    | 0 | 0 | 0     | 0.062 | 0     | 0.9 | 0.472 | 0.946 |
| STAT1    | TNF    | 9606.ENSP00000354394 | 9606.ENSP00000398698 | 0                    | 0 | 0 | 0     | 0.061 | 0     | 0.9 | 0.73  | 0.972 |
| STAT3    | VCAM1  | 9606.ENSP00000264657 | 9606.ENSP00000294728 | 0                    | 0 | 0 | 0     | 0.061 | 0     | 0.9 | 0.506 | 0.949 |
| STAT3    | TNF    | 9606.ENSP00000264657 | 9606.ENSP00000398698 | 0                    | 0 | 0 | 0     | 0     | 0     | 0.9 | 0.774 | 0.976 |
| STAT3    | VEGFA  | 9606.ENSP00000264657 | 9606.ENSP00000478570 | 0                    | 0 | 0 | 0     | 0     | 0.434 | 0.9 | 0.916 | 0.994 |
| SULT1E1  | TERT   | 9606.ENSP00000226444 | 9606.ENSP00000309572 | 0                    | 0 | 0 | 0     | 0     | 0     | 0   | 0.925 | 0.925 |
|          | TNF    | VCAM1                | 9606.ENSP00000398698 | 9606.ENSP00000294728 | 0 | 0 | 0     | 0     | 0     | 0   | 0.949 | 0.994 |
|          | TNF    | VEGFA                | 9606.ENSP00000398698 | 9606.ENSP00000478570 | 0 | 0 | 0     | 0     | 0     | 0   | 0.919 | 0.919 |
